# Supplementary material
Source: PubMed Central journal article supplement (PMC7578357)
Supplement: jexbio-223-227843-s1.pdf [file jexbio-223-227843-s1.pdf]

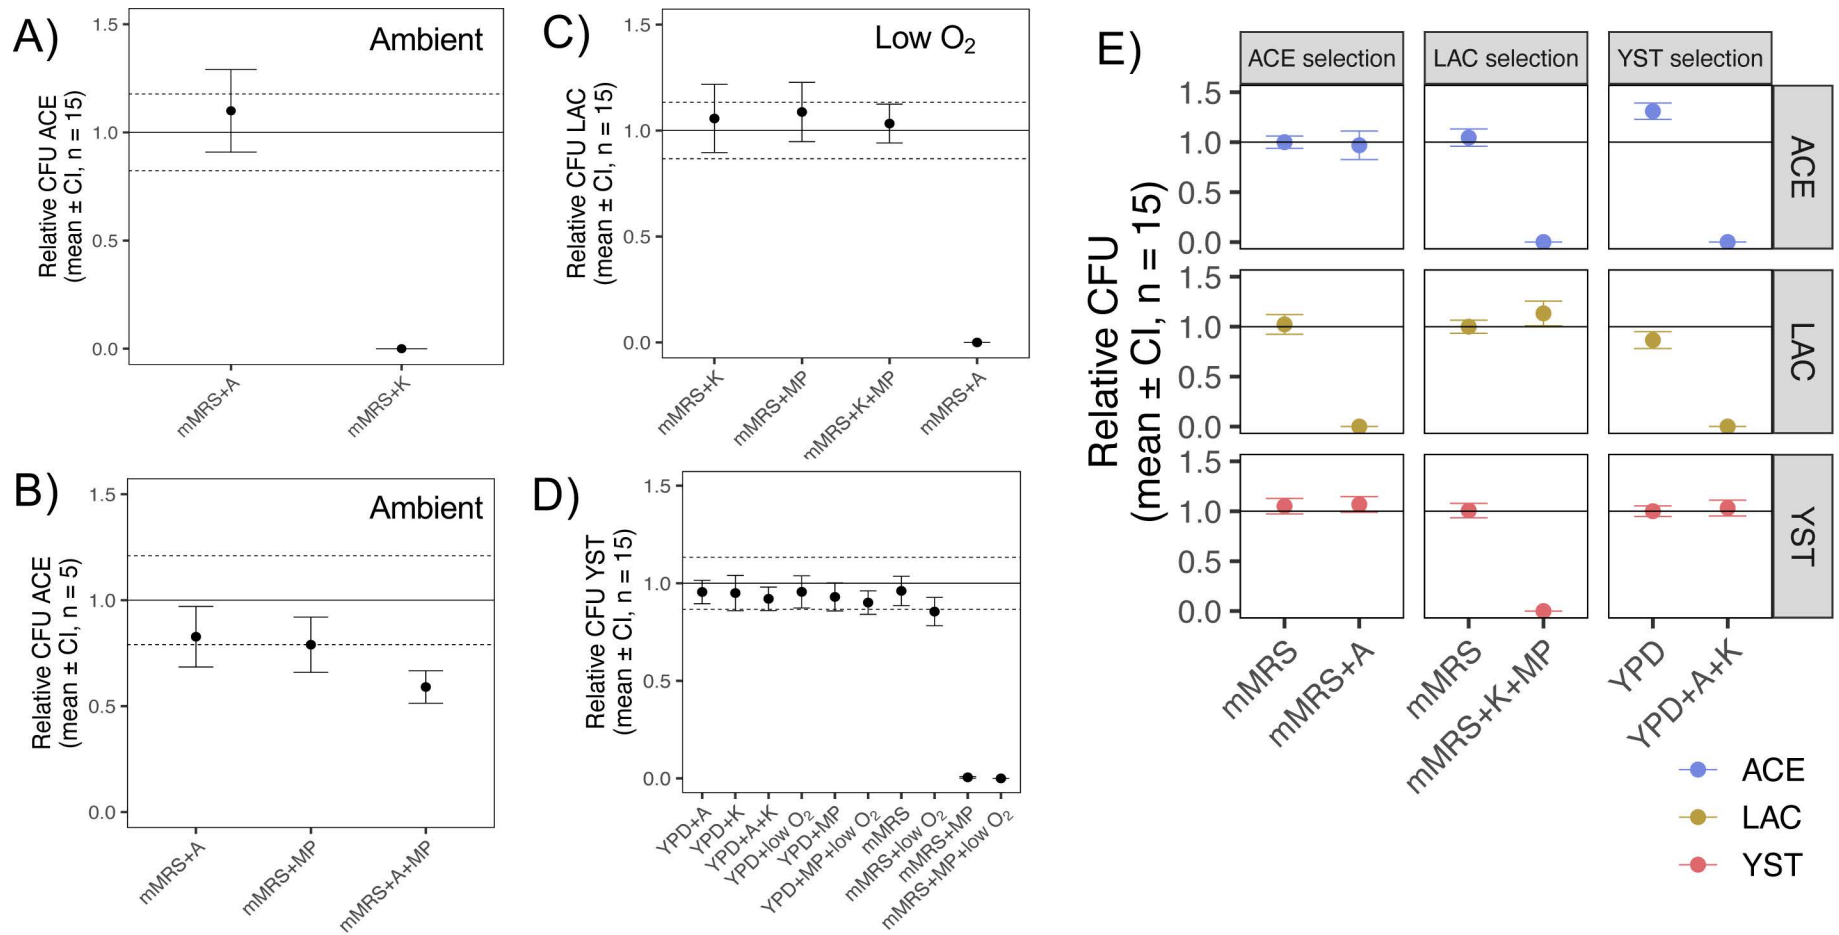

Fig S1 Method development for microbial selection media. Assessment of antimicrobials selected to inhibit (A & B) ACE, (C) LAC, and (D) YST using mono-cultures. (E) Validation of media and antimicrobials used to select for ACE, LAC, and YST using tri-culture community to calculate microbial abundance. Data represents five replicates from three independent experimental replicates, except for panel (B), which had one experimental replicate. CFU was normalized to CFU of microbe grown under optimal conditions (see Table 1). The mean and 95% confidence intervals of positive control are shown as lines for each panel (solid and dashed, respectively). Non-overlapping confidence intervals indicate significant difference between treatments. K = kanamycin. A = ampicillin. MP = methylparaben.

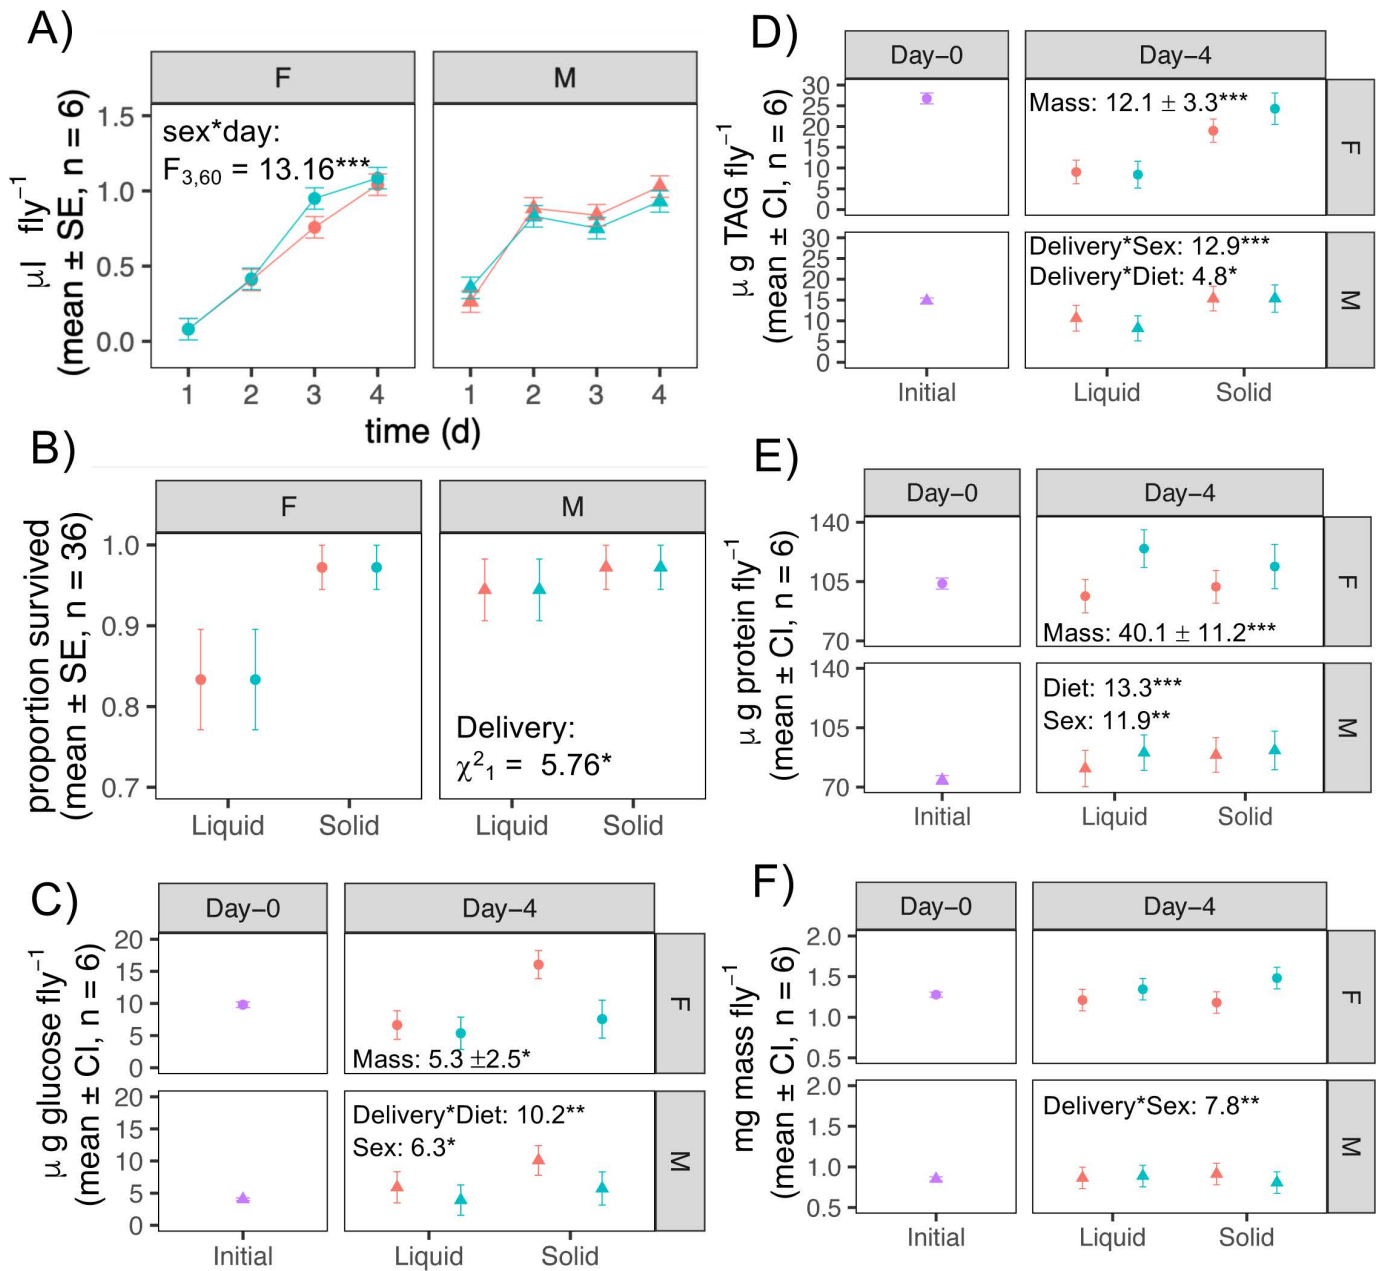

Fig S2. Method development for capillary feeding experiments. Comparison of diet (holidic v. meridic) and delivery method (liquid or solid) on fly (A) feeding rate, (B) survival, nutritional indices ((C) glucose, (D) TAG, and (E) protein content), and fly weight for female (F) and male (M) flies. All data are displayed as estimated marginal mean and SE or CI, except for the raw mean and SE are shown for survival data. For nutritional indices and fly weight, day-0 raw mean and CI are shown for starting reference. The significant effect terms from models are displayed for each panel (significant main effects are not included if interaction term is significant). Panels C-F, the residual degrees of freedom are 39 and the fly weight covariate slope and SE are included under the day-4 label. Note: for solid medium, there is no direct measure of fly feeding as for the CAFÉ method. Significance: \*  $p < 0.05$ , \*\*  $p < 0.01$ , \*\*\*  $p < 0.001$ .

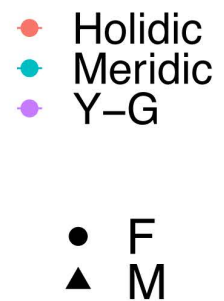

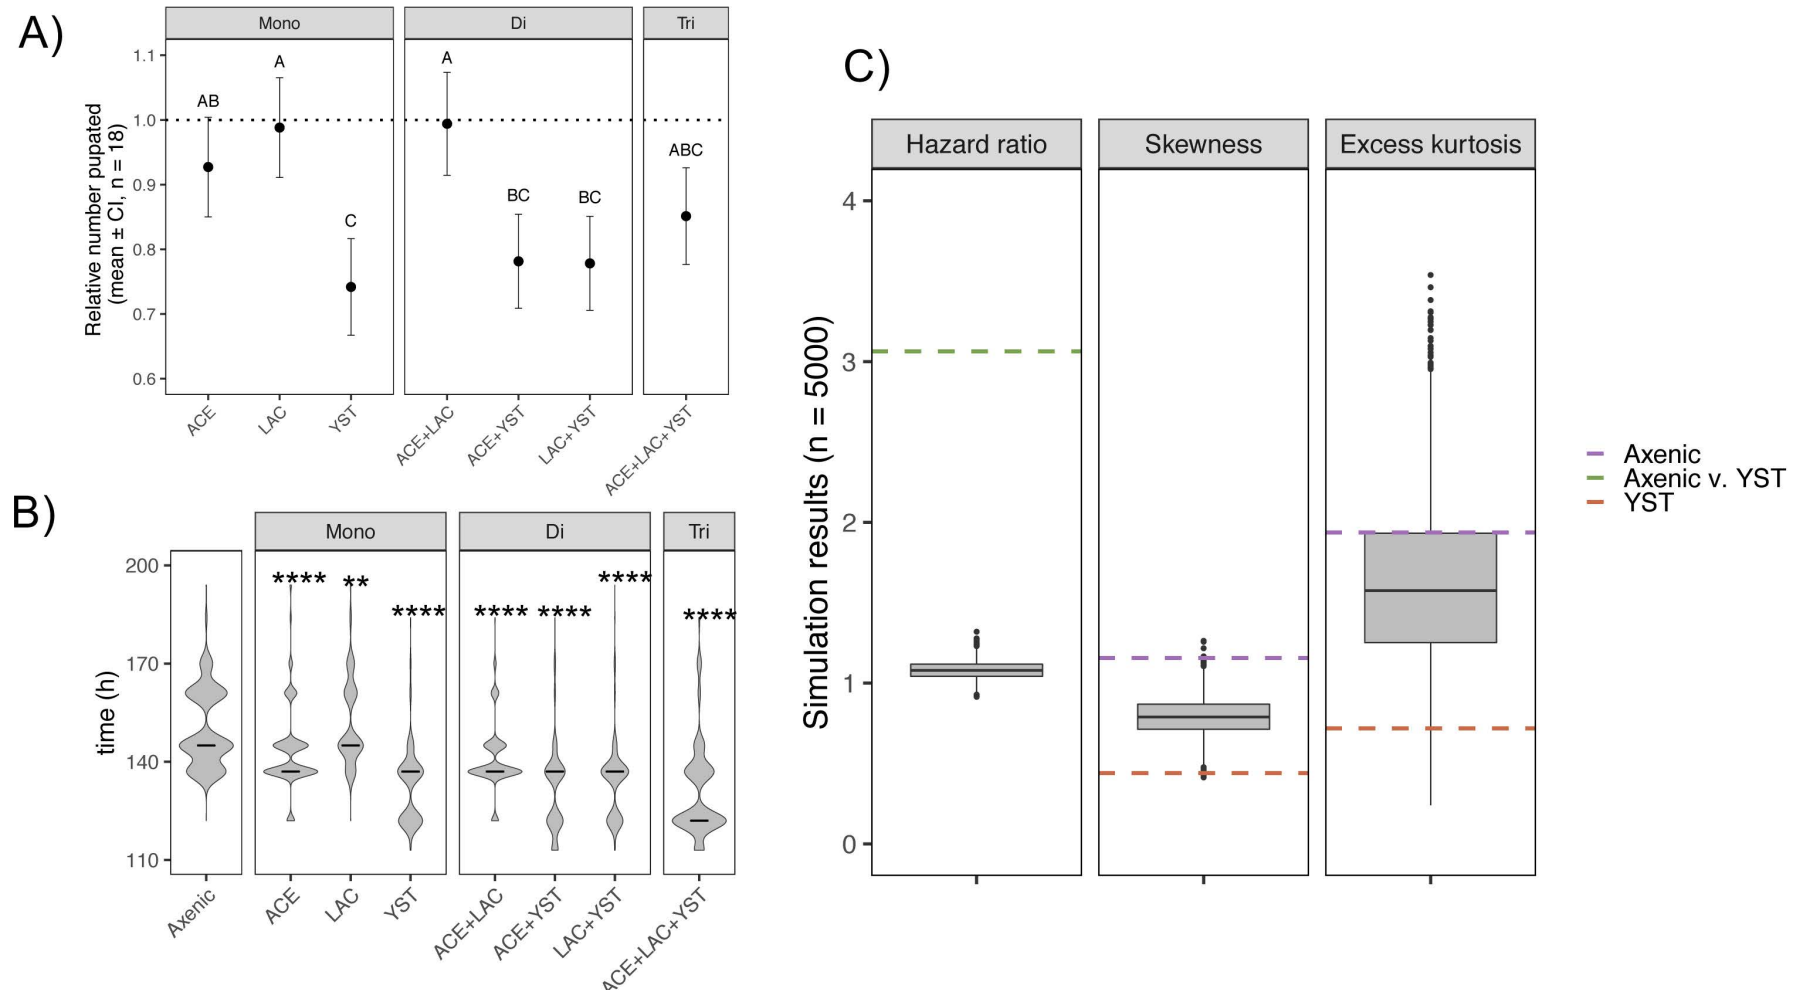

Fig. S3. Analyses of *Drosophila* development time. (A) Relative number of insects pupated, (B) violin plot for time to pupation, and (C) summary statistics of simulated YST time to eclosion. In panel (A), the estimated marginal mean and 95% confidence intervals from ANOVA analysis are plotted, along with letter rankings from *post hoc* Tukey tests. The dashed line is the average value for axenic flies; confidence intervals that do not overlap with this line indicate a significant difference from axenic insects. Probability density function and median time (black bar) are shown for the time to pupation in panel (B). Asterisks indicated significance for Kolmogorov-Smirnov test \*\* < 0.01 and \*\*\*\* < 0.0001. Statistics for ANOVA treatment effect:  $F_{6,110} = 7.40$ ,  $p = 1.15 \times 10^{-6}$ ,  $R^2 = 0.29$ . Distribution statistics are in Table S1C. For panel (C), hazard ratio from Cox regression comparing simulated YST eclosion time to axenic data and measures of distribution shape (skewness and excess kurtosis) are shown from all 5,000 simulations. The dashed lines indicate results from observed data distributions to compare how the simulations performed against the observed data. For Cox regression analyses, only 22% of simulations had significant results. The variation in hazard ratios was low across simulations (relative standard deviation [RSD] = 5.2%), and the median time for all YST simulations was equal to the axenic flies (observed axenic and YST median time, 242 and 233 h, respectively) with increased measures of skewness and kurtosis. Simulated YST data indicates that if all flies reached eclosion, it is likely that this would result in an eclosion rate similar to the observed axenic fly data. Mono = mono-association. Di = di-association. Tri = tri-association.

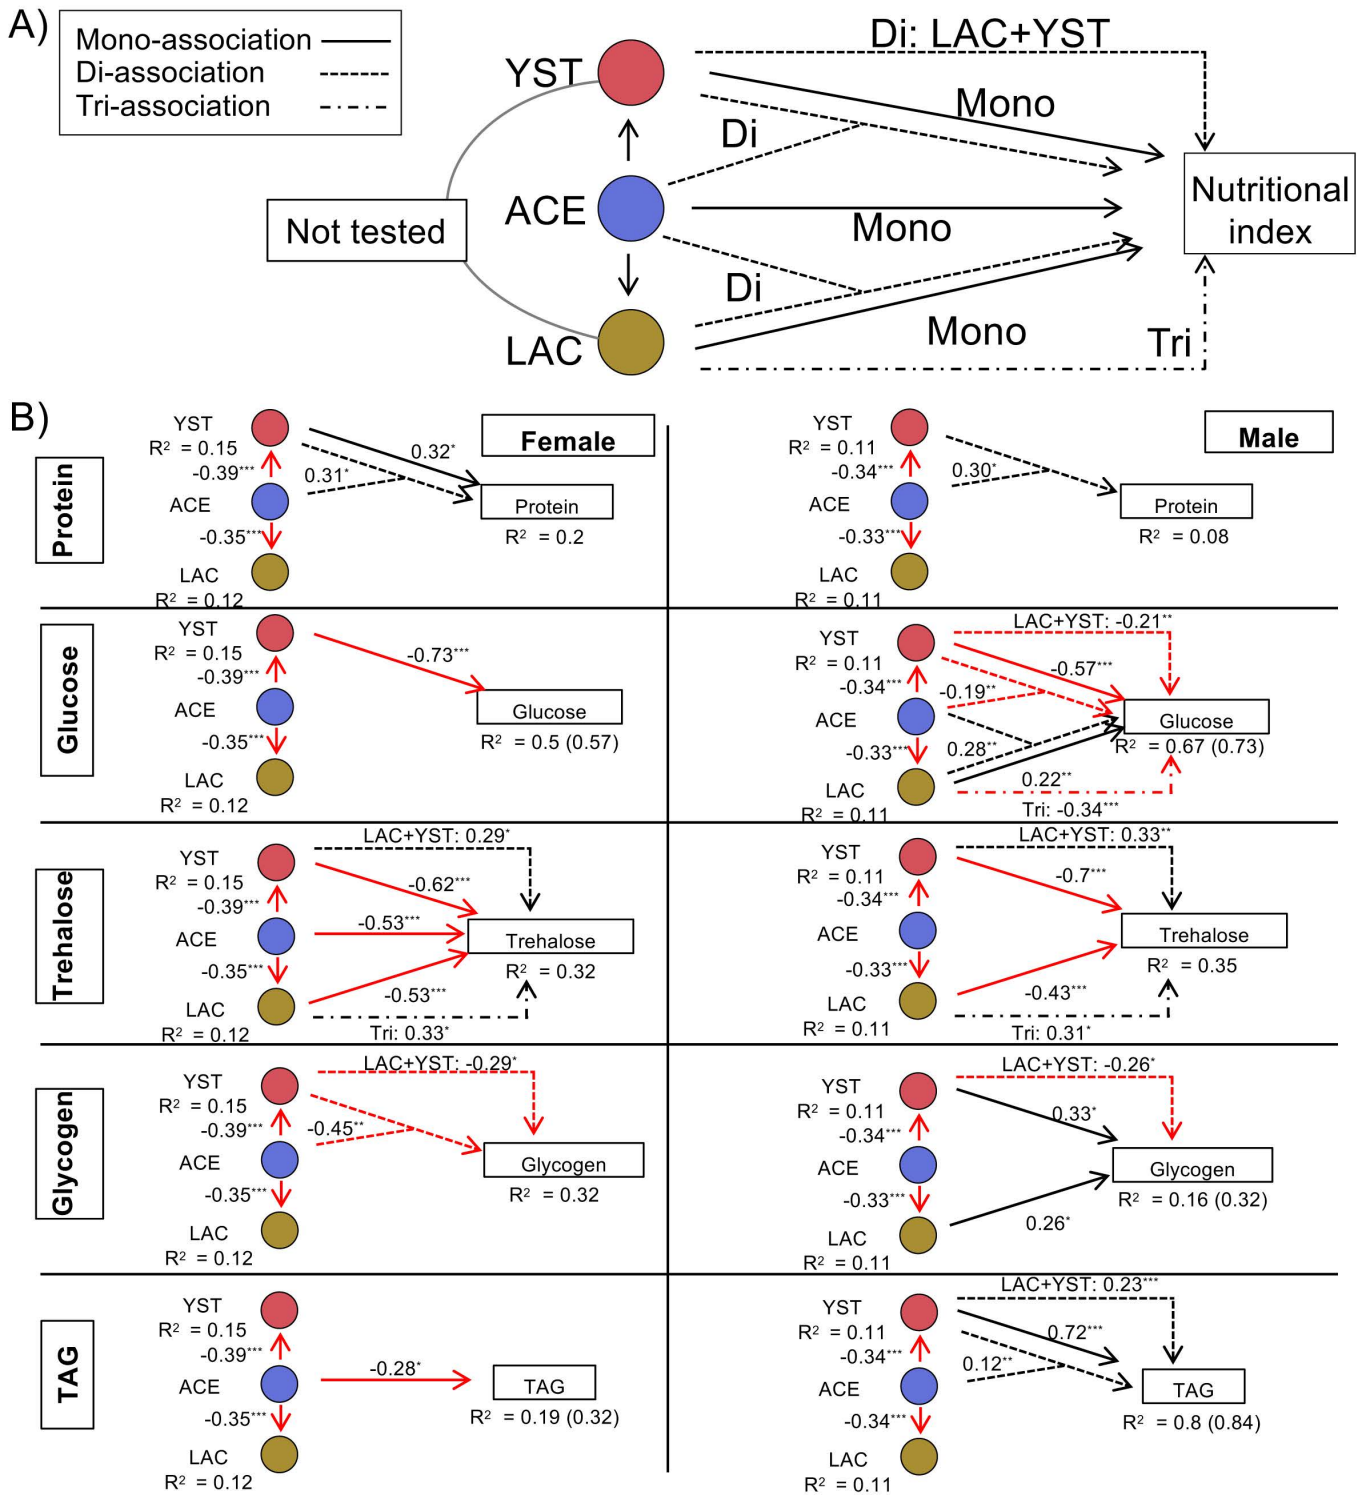

Fig. S4. Nutritional indices. (A) Generalized path analysis model tested to understand among-microbe interactions and their effect on a given nutritional index and (B) association of among-microbe interactions with nutritional indices. Most models did not include a random effect for experimental replicate ( $p > 0.05$ ), except for some of the linear models associating a nutritional index to among-microbe interactions (e.g. TAG ~ ACE\*LAC\*YST). These models include glucose content (both sexes), glycogen content (males only), and TAG content (both sexes). For Fig. 4 and S4B, both the marginal and conditional  $R^2$  are reported for the nutritional index response variable. For panel B, left- and right-side are female and male flies, respectively. Red and black arrows indicate negative and positive associations, respectively. The standardized coefficient for each significant association and marginal  $R^2$  values for all response variables are shown, with conditional  $R^2$  values shown in parentheses if needed. Full description of statistical tests are in Table S1E.

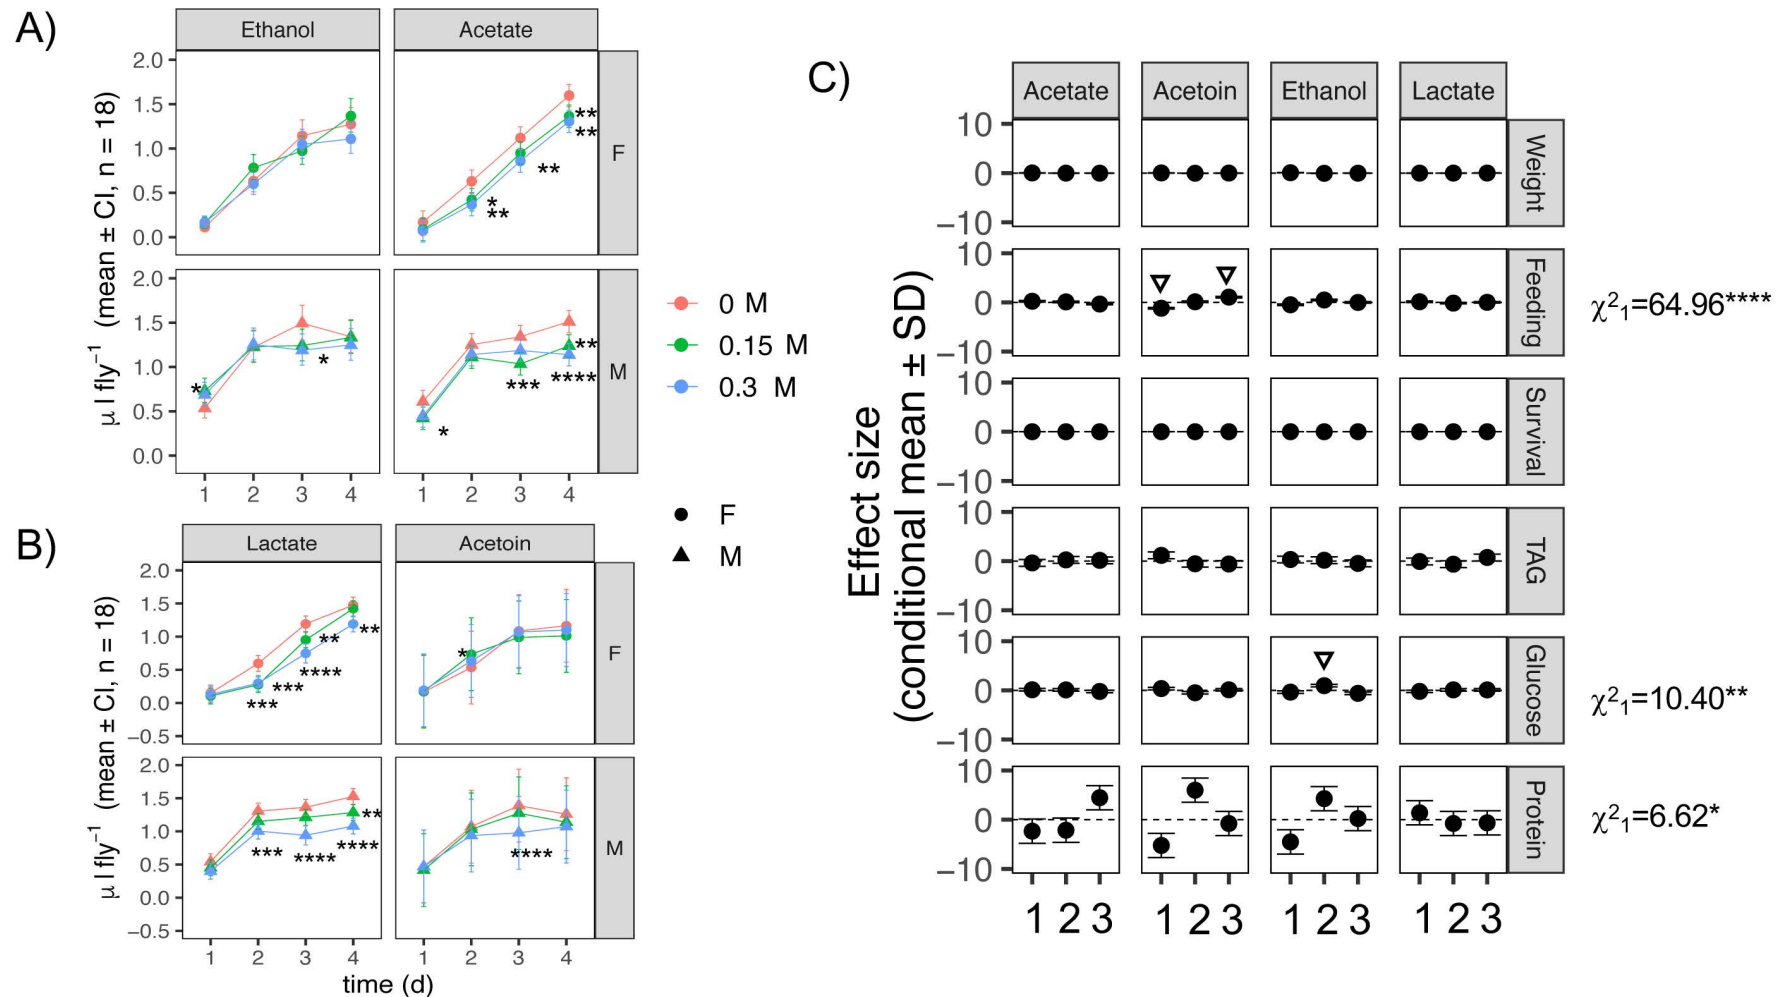

Fig. S5. Performance and nutritional indices of *Drosophila* in CAFÉ assays. Feeding rates of flies administered (A) ethanol, (A) acetate, (B) lactate or (B) acetoin. (C) Comparison of variation between independent experimental replicates for the measures: fly weight, total diet volume consumed by day-4 (Feeding), survival at day-4 (Survival), and nutritional indices for TAG, glucose, and protein content. For panels A and B, the estimated marginal mean and confidence interval are plotted from ANOVA model. *Post hoc* Dunnett's test was used to compare treatments (0.15 and 0.3 M) to control diet for each day and sex (significance: \*  $p < 0.05$ , \*\*  $p < 0.01$ , \*\*\*  $p < 0.001$ , \*\*\*\*  $p < 0.0001$ ). Effect test results in Table S1F. For panel C, experimental replicates are labeled as 1, 2, and 3 for each metabolite. Data are displayed as estimated conditional mean and standard deviation for experimental replicate random effect from each model. The dashed line indicates the grand mean. Significant effect terms from each model are shown next to measure label (significance: \*  $p < 0.05$ , \*\*  $p < 0.01$ , \*\*\*\*  $p < 0.0001$ ). Open-triangle indicates experimental replicates that differ from grand mean as determined by non-overlapping 95% confidence intervals from simulated posterior distributions (note: no differences were found for protein content in the *post hoc* analysis). F = female. M = male. See Dyrad (doi: 10.5061/dryad.ngf1vhrj) for extended version of this figure with data displayed from all associated measures in CAFÉ assays.

Table S1A. Effect of co-associations on microbial abundance and biomass

| Analysis categories           | ACE                                                                           | LAC                                                                       | YST                                                                           | Total abundance                                                                | Total biomass                                                                  |
|-------------------------------|-------------------------------------------------------------------------------|---------------------------------------------------------------------------|-------------------------------------------------------------------------------|--------------------------------------------------------------------------------|--------------------------------------------------------------------------------|
| <b>Tukey test</b>             |                                                                               |                                                                           |                                                                               |                                                                                |                                                                                |
| ACE-F                         | B                                                                             | -                                                                         | -                                                                             | B                                                                              | C                                                                              |
| ACE-M                         | ab                                                                            | -                                                                         | -                                                                             | ab                                                                             | bc                                                                             |
| LAC-F                         | -                                                                             | A                                                                         | -                                                                             | B                                                                              | BC                                                                             |
| LAC-M                         | -                                                                             | a                                                                         | -                                                                             | bc                                                                             | bc                                                                             |
| YST-F                         | -                                                                             | -                                                                         | A                                                                             | CD                                                                             | A                                                                              |
| YST-M                         | -                                                                             | -                                                                         | a                                                                             | d                                                                              | a                                                                              |
| ACE+LAC-F                     | A                                                                             | D                                                                         | -                                                                             | A                                                                              | B                                                                              |
| ACE+LAC-M                     | a                                                                             | d                                                                         | -                                                                             | a                                                                              | b                                                                              |
| ACE+YST-F                     | C                                                                             | -                                                                         | B                                                                             | D                                                                              | D                                                                              |
| ACE+YST-M                     | c                                                                             | -                                                                         | b                                                                             | cd                                                                             | c                                                                              |
| LAC+YST-F                     | -                                                                             | B                                                                         | A                                                                             | BC                                                                             | A                                                                              |
| LAC+YST-M                     | -                                                                             | b                                                                         | a                                                                             | bcd                                                                            | a                                                                              |
| ACE+LAC+YST-F                 | C                                                                             | C                                                                         | B                                                                             | CD                                                                             | CD                                                                             |
| ACE+LAC+YST-M                 | bc                                                                            | c                                                                         | b                                                                             | bcd                                                                            | c                                                                              |
| <b>ANOVA</b>                  |                                                                               |                                                                           |                                                                               |                                                                                |                                                                                |
| <b>Effect test</b>            |                                                                               |                                                                           |                                                                               |                                                                                |                                                                                |
| Treatment                     | <b>F<sub>3,60</sub> = 31.58,</b><br><b>p = 2.2x10<sup>-12</sup></b>           | <b>F<sub>3,60</sub> = 231.69,</b><br><b>p &lt; 2.2 x 10<sup>-16</sup></b> | <b>F<sub>3,64</sub> = 198.01,</b><br><b>p &lt; 2.2 x 10<sup>-16</sup></b>     | <b>F<sub>6,108.04</sub> = 17.23,</b><br><b>p = 6.80 x 10<sup>-14</sup></b>     | <b>F<sub>6,106.73</sub> = 48.20,</b><br><b>p &lt; 2.2 x 10<sup>-16</sup></b>   |
| Sex                           | <b>F<sub>1,62</sub> = 5.51,</b><br><b>p = 0.0221</b>                          | F <sub>1,62</sub> = 3.53,<br>p = 0.0650                                   | <b>F<sub>1,66</sub> = 9.60,</b><br><b>p = 0.0029</b>                          | <b>F<sub>1,110</sub> = 33.23,</b><br><b>p = 7.59 x 10<sup>-8</sup></b>         | <b>F<sub>1,107.43</sub> = 40.74,</b><br><b>p = 4.52 x 10<sup>-9</sup></b>      |
| Interaction                   | F <sub>3,62</sub> = 2.74,<br>p = 0.0506                                       | F <sub>3,62</sub> = 1.12,<br>p = 0.3469                                   | <b>F<sub>3,66</sub> = 13.25,</b><br><b>p = 7.2 x 10<sup>-7</sup></b>          | <b>F<sub>6,110</sub> = 2.55,</b><br><b>p = 0.0236</b>                          | <b>F<sub>6,107.50</sub> = 4.21,</b><br><b>p = 0.0008</b>                       |
| <b>Analysis of Deviance</b>   |                                                                               |                                                                           |                                                                               |                                                                                |                                                                                |
| Experimental replicate (Vial) | <b>X<sup>2</sup><sub>2</sub> = 29.71,</b><br><b>p = 3.5 x 10<sup>-7</sup></b> | X <sup>2</sup> <sub>2</sub> = 0,<br>p = 1                                 | <b>X<sup>2</sup><sub>2</sub> = 20.92,</b><br><b>p = 2.9 x 10<sup>-5</sup></b> | <b>X<sup>2</sup><sub>2</sub> = 23.34,</b><br><b>p = 8.53 x 10<sup>-6</sup></b> | <b>X<sup>2</sup><sub>2</sub> = 30.59,</b><br><b>p = 2.27 x 10<sup>-7</sup></b> |
| <b>R<sup>2</sup></b>          |                                                                               |                                                                           |                                                                               |                                                                                |                                                                                |
| Marginal                      | 0.404                                                                         | 0.843                                                                     | 0.848                                                                         | 0.398                                                                          | 0.632                                                                          |
| Conditional                   | 0.682                                                                         | 0.843                                                                     | 0.922                                                                         | 0.632                                                                          | 0.797                                                                          |

The *post hoc* Tukey test was implemented to assess differences in microbial abundance between treatments for each sex. Uppercase letters are used to represent the ranking of female samples and lowercase letters are used to distinguish the rankings for male samples. A hyphen indicates treatment-sex combinations that were not used in species-specific analyses. P-values below the threshold are bolded.

Table S1B. Mixed effect Cox regression model results for influence of microbiota treatment on development time

| <b>i) Time to pupation: Axenic reference</b>                                               |                                     |              |              |                    |
|--------------------------------------------------------------------------------------------|-------------------------------------|--------------|--------------|--------------------|
| Treatment                                                                                  | Coefficient $\pm$ SE <sup>a</sup>   | Hazard Ratio | z-value      | p-value            |
| ACE                                                                                        | <b>0.383 <math>\pm</math> 0.090</b> | <b>1.466</b> | <b>4.26</b>  | <b>&lt; 0.0001</b> |
| LAC                                                                                        | -0.067 $\pm$ 0.091                  | 0.935        | -0.74        | 0.46               |
| YST                                                                                        | <b>1.231 <math>\pm</math> 0.089</b> | <b>3.426</b> | <b>13.87</b> | <b>&lt; 0.0001</b> |
| ACE+LAC                                                                                    | <b>0.618 <math>\pm</math> 0.091</b> | <b>1.856</b> | <b>6.79</b>  | <b>&lt; 0.0001</b> |
| ACE+YST                                                                                    | <b>1.298 <math>\pm</math> 0.087</b> | <b>3.663</b> | <b>14.91</b> | <b>&lt; 0.0001</b> |
| LAC+YST                                                                                    | <b>1.150 <math>\pm</math> 0.087</b> | <b>3.157</b> | <b>13.28</b> | <b>&lt; 0.0001</b> |
| ACE+LAC+YST                                                                                | <b>1.142 <math>\pm</math> 0.088</b> | <b>3.132</b> | <b>12.91</b> | <b>&lt; 0.0001</b> |
| Analysis of deviance for Experiment(vial): $\chi^2_2 = 653.13$ , $p < 2.2 \times 10^{-16}$ |                                     |              |              |                    |
| <b>ii) Time to eclosion: Axenic reference</b>                                              |                                     |              |              |                    |
| Treatment                                                                                  | Coefficient $\pm$ SE <sup>a</sup>   | Hazard Ratio | z-value      | p-value            |
| ACE                                                                                        | <b>0.411 <math>\pm</math> 0.085</b> | <b>1.509</b> | <b>4.81</b>  | <b>&lt; 0.0001</b> |
| LAC                                                                                        | -0.014 $\pm$ 0.086                  | 0.987        | -0.16        | 0.87               |
| YST                                                                                        | <b>1.120 <math>\pm</math> 0.084</b> | <b>3.064</b> | <b>13.27</b> | <b>&lt; 0.0001</b> |
| ACE+LAC                                                                                    | <b>0.602 <math>\pm</math> 0.086</b> | <b>1.826</b> | <b>6.97</b>  | <b>&lt; 0.0001</b> |
| ACE+YST                                                                                    | <b>1.378 <math>\pm</math> 0.083</b> | <b>3.968</b> | <b>16.61</b> | <b>&lt; 0.0001</b> |
| LAC+YST                                                                                    | <b>1.141 <math>\pm</math> 0.082</b> | <b>3.129</b> | <b>13.87</b> | <b>&lt; 0.0001</b> |
| ACE+LAC+YST                                                                                | <b>1.270 <math>\pm</math> 0.083</b> | <b>3.559</b> | <b>15.26</b> | <b>&lt; 0.0001</b> |
| Analysis of deviance for Experiment(vial): $\chi^2_2 = 367.93$ , $p < 2.2 \times 10^{-16}$ |                                     |              |              |                    |

<sup>a</sup>standard error

P-values below the threshold are bolded.

Table S1C. Microbial treatment effect on pupation and eclosion time distribution shape

| Treatment                | Pupation                                                                               |                                                                                      | Eclosion                                                                               |                                                                                      |
|--------------------------|----------------------------------------------------------------------------------------|--------------------------------------------------------------------------------------|----------------------------------------------------------------------------------------|--------------------------------------------------------------------------------------|
|                          | Skewness                                                                               | Kurtosis                                                                             | Skewness                                                                               | Kurtosis                                                                             |
| Axenic                   | skew = <b>0.63154</b> ,<br>z = <b>8.16090</b> ,<br>p = <b>3.324 x 10<sup>-16</sup></b> | kurt = <b>2.5632</b> ,<br>z = <b>-3.8453</b> ,<br>p = <b>0.0001204</b>               | skew = <b>1.1559</b> ,<br>z = <b>13.3350</b> ,<br>p < <b>2.2 x 10<sup>-16</sup></b>    | kurt = <b>4.9370</b> ,<br>z = <b>7.5279</b> ,<br>p = <b>5.155 x 10<sup>-14</sup></b> |
| ACE                      | skew = <b>1.4526</b> ,<br>z = <b>13.9400</b> ,<br>p < <b>2.2 x 10<sup>-16</sup></b>    | kurt = <b>6.5036</b> ,<br>z = <b>9.1271</b> ,<br>p < <b>2.2 x 10<sup>-16</sup></b>   | skew = <b>1.3758</b> ,<br>z = <b>13.5040</b> ,<br>p < <b>2.2 x 10<sup>-16</sup></b>    | kurt = <b>5.1519</b> ,<br>z = <b>7.1994</b> ,<br>p = <b>6.05 x 10<sup>-13</sup></b>  |
| LAC                      | skew = <b>0.75575</b> ,<br>z = <b>8.77260</b> ,<br>p < <b>2.2 x 10<sup>-16</sup></b>   | kurt = 2.8148,<br>z = -1.2101,<br>p = 0.2263                                         | skew = <b>0.995</b> ,<br>z = <b>10.804</b> ,<br>p < <b>2.2 x 10<sup>-16</sup></b>      | kurt = <b>3.7046</b> ,<br>z = <b>3.5312</b> ,<br>p = <b>0.0004137</b>                |
| YST                      | skew = <b>1.0856</b> ,<br>z = <b>10.5910</b> ,<br>p < <b>2.2 x 10<sup>-16</sup></b>    | kurt = <b>5.3998</b> ,<br>z = <b>7.0930</b> ,<br>p = <b>1.313 x 10<sup>-12</sup></b> | skew = <b>0.44015</b> ,<br>z = <b>4.91990</b> ,<br>p = <b>8.66 x 10<sup>-7</sup></b>   | kurt = <b>3.7181</b> ,<br>z = <b>3.2819</b> ,<br>p = <b>0.001031</b>                 |
| ACE + LAC                | skew = <b>1.077</b> ,<br>z = <b>11.327</b> ,<br>p < <b>2.2 x 10<sup>-16</sup></b>      | kurt = <b>5.3551</b> ,<br>z = <b>7.5245</b> ,<br>p = <b>5.292 x 10<sup>-14</sup></b> | skew = <b>1.7202</b> ,<br>z = <b>15.5100</b> ,<br>p < <b>2.2 x 10<sup>-16</sup></b>    | kurt = <b>6.8955</b> ,<br>z = <b>9.5624</b> ,<br>p < <b>2.2 x 10<sup>-16</sup></b>   |
| ACE + YST                | skew = <b>0.82543</b> ,<br>z = <b>9.04410</b> ,<br>p < <b>2.2 x 10<sup>-16</sup></b>   | kurt = <b>4.2327</b> ,<br>z = <b>5.0514</b> ,<br>p = <b>4.386 x 10<sup>-7</sup></b>  | skew = <b>0.63815</b> ,<br>z = <b>7.17800</b> ,<br>p = <b>7.073 x 10<sup>-13</sup></b> | kurt = 3.08720,<br>z = 0.63387,<br>p = 0.5262                                        |
| LAC + YST                | skew = <b>1.1518</b> ,<br>z = <b>11.6320</b> ,<br>p < <b>2.2 x 10<sup>-16</sup></b>    | kurt = <b>6.4887</b> ,<br>z = <b>8.9211</b> ,<br>p < <b>2.2 x 10<sup>-16</sup></b>   | skew = <b>0.51589</b> ,<br>z = <b>5.99600</b> ,<br>p = <b>2.023 x 10<sup>-9</sup></b>  | kurt = <b>4.4441</b> ,<br>z = <b>5.5318</b> ,<br>p = <b>3.17 x 10<sup>-8</sup></b>   |
| ACE + LAC + YST          | skew = <b>1.3636</b> ,<br>z = <b>13.3130</b> ,<br>p < <b>2.2 x 10<sup>-16</sup></b>    | kurt = <b>4.9863</b> ,<br>z = <b>6.8362</b> ,<br>p = <b>8.132 x 10<sup>-12</sup></b> | skew = <b>0.35846</b> ,<br>z = <b>4.29100</b> ,<br>p = <b>1.779 x 10<sup>-5</sup></b>  | kurt = 2.7491,<br>z = -1.6526,<br>p = 0.09842                                        |
| Kolmogorov-Smirnov tests | Pupation                                                                               |                                                                                      | Eclosion                                                                               |                                                                                      |
|                          | <i>D statistic</i>                                                                     | <i>p-value</i>                                                                       | <i>D statistic</i>                                                                     | <i>p-value</i>                                                                       |
| ACE - Axenic             | <b>0.2736</b>                                                                          | < <b>2.2 x 10<sup>-16</sup></b>                                                      | <b>0.2347</b>                                                                          | < <b>2.2 x 10<sup>-16</sup></b>                                                      |
| LAC - Axenic             | <b>0.08423</b>                                                                         | <b>0.0010</b>                                                                        | 0.0311                                                                                 | 0.6761                                                                               |
| YST - Axenic             | <b>0.5896</b>                                                                          | < <b>2.2 x 10<sup>-16</sup></b>                                                      | <b>0.5428</b>                                                                          | < <b>2.2 x 10<sup>-16</sup></b>                                                      |
| ACE + LAC - Axenic       | <b>0.3861</b>                                                                          | < <b>2.2 x 10<sup>-16</sup></b>                                                      | <b>0.3156</b>                                                                          | < <b>2.2 x 10<sup>-16</sup></b>                                                      |
| ACE + YST - Axenic       | <b>0.6047</b>                                                                          | < <b>2.2 x 10<sup>-16</sup></b>                                                      | <b>0.6781</b>                                                                          | < <b>2.2 x 10<sup>-16</sup></b>                                                      |
| LAC + YST - Axenic       | <b>0.6119</b>                                                                          | < <b>2.2 x 10<sup>-16</sup></b>                                                      | <b>0.5388</b>                                                                          | < <b>2.2 x 10<sup>-16</sup></b>                                                      |
| ACE + LAC + YST - Axenic | <b>0.5740</b>                                                                          | < <b>2.2 x 10<sup>-16</sup></b>                                                      | <b>0.6081</b>                                                                          | < <b>2.2 x 10<sup>-16</sup></b>                                                      |

P-values below the threshold are bolded.



Table S1D. Effect of microbial treatment and sex on fly weight and nutritional indices

| Analysis categories           | Weight                                                                | Protein                                                           | TAG                                                                     | Glucose                                                                   | Trehalose                                                                | Glycogen                                                                |
|-------------------------------|-----------------------------------------------------------------------|-------------------------------------------------------------------|-------------------------------------------------------------------------|---------------------------------------------------------------------------|--------------------------------------------------------------------------|-------------------------------------------------------------------------|
| <i>ANOVA Effect test</i>      |                                                                       |                                                                   |                                                                         |                                                                           |                                                                          |                                                                         |
| Treatment                     | <b>F<sub>7,122.53</sub> = 16.75,</b><br>p = 2.3 x 10 <sup>-15</sup>   | <b>F<sub>7,124.11</sub> = 5.61,</b><br>p = 1.2 x 10 <sup>-5</sup> | <b>F<sub>7,124.02</sub> = 62.41,</b><br>p < 2.2 x 10 <sup>-16</sup>     | <b>F<sub>7,124.05</sub> = 68.53,</b><br>p < 2.2 x 10 <sup>-16</sup>       | <b>F<sub>7,124.22</sub> = 12.46,</b><br>p = 5.1 x 10 <sup>-12</sup>      | <b>F<sub>7,124.04</sub> = 8.64,</b><br>p = 1.3 x 10 <sup>-8</sup>       |
| Sex                           | <b>F<sub>1,124.02</sub> = 4933.70,</b><br>p < 2.2 x 10 <sup>-16</sup> | <b>F<sub>1,126</sub> = 19.69,</b><br>p = 2.0 x 10 <sup>-5</sup>   | <b>F<sub>1,126</sub> = 43.22,</b><br>p = 1.2 x 10 <sup>-9</sup>         | <b>F<sub>1,126</sub> = 836.85,</b><br>p < 2.2 x 10 <sup>-16</sup>         | <b>F<sub>1,1126</sub> = 68.70,</b><br>p = 1.5 x 10 <sup>-13</sup>        | <b>F<sub>1,126</sub> = 376.79,</b><br>p < 2.2 x 10 <sup>-16</sup>       |
| Interaction                   | <b>F<sub>3,124.09</sub> = 8.11,</b><br>p = 4.2 x 10 <sup>-8</sup>     | F <sub>7,126</sub> = 1.24,<br>p = 0.2848                          | <b>F<sub>7,126</sub> = 36.86,</b><br>p < 2.2 x 10 <sup>-16</sup>        | <b>F<sub>7,126</sub> = 10.08,</b><br>p = 5.8 x 10 <sup>-10</sup>          | <b>F<sub>7,126</sub> = 3.10,</b><br>p = 0.0047                           | <b>F<sub>6,126</sub> = 7.19,</b><br>p = 3.1 x 10 <sup>-7</sup>          |
| <i>Analysis of Deviance</i>   |                                                                       |                                                                   |                                                                         |                                                                           |                                                                          |                                                                         |
| Experimental replicate (Vial) | X <sup>2</sup> <sub>2</sub> = 0.72,<br>p = 0.6974                     | X <sup>2</sup> <sub>2</sub> = 3.02,<br>p = 0.221                  | <b>X<sup>2</sup><sub>2</sub> = 23.25,</b><br>p = 8.9 x 10 <sup>-6</sup> | <b>X<sup>2</sup><sub>2</sub> = 631.42,</b><br>p < 2.2 x 10 <sup>-16</sup> | <b>X<sup>2</sup><sub>2</sub> = 94.21,</b><br>p < 2.2 x 10 <sup>-16</sup> | <b>X<sup>2</sup><sub>2</sub> = 20.35,</b><br>p = 3.8 x 10 <sup>-5</sup> |
| <i>R<sup>2</sup></i>          |                                                                       |                                                                   |                                                                         |                                                                           |                                                                          |                                                                         |
| Marginal                      | 0.947                                                                 | 0.211                                                             | 0.702                                                                   | 0.812                                                                     | 0.394                                                                    | 0.578                                                                   |
| Conditional                   | 0.952                                                                 | 0.304                                                             | 0.747                                                                   | 0.881                                                                     | 0.825                                                                    | 0.704                                                                   |

P-values below the threshold are bolded.

Table S1E. Structural equation model output for among-microbe interactions and their influence on *Drosophila* nutritional indices.

| <b>i) Protein content – Female samples</b> (Fisher's C = 1.295, df = 2, p = 0.523)   |                    |                            |               |                          |                    |
|--------------------------------------------------------------------------------------|--------------------|----------------------------|---------------|--------------------------|--------------------|
| Response                                                                             | Predictor          | Unstandardized coefficient | SE            | Standardized coefficient | P value            |
| Protein                                                                              | ACE                | -0.4200                    | 2.0154        | -0.0307                  | 0.8352             |
| Protein                                                                              | LAC                | -1.7197                    | 2.0957        | -0.0951                  | 0.4134             |
| <b>Protein</b>                                                                       | <b>YST</b>         | <b>5.7954</b>              | <b>2.2936</b> | <b>0.3239</b>            | <b>0.0127</b>      |
| Protein                                                                              | ACE*LAC            | -0.2194                    | 1.8894        | -0.0179                  | 0.9077             |
| <b>Protein</b>                                                                       | <b>ACE*YST</b>     | <b>3.5765</b>              | <b>1.7824</b> | <b>0.3138</b>            | <b>0.0469</b>      |
| Protein                                                                              | LAC*YST            | 0.4653                     | 0.9844        | 0.0626                   | 0.6373             |
| Protein                                                                              | ACE*LAC*YST        | -1.3972                    | 1.5684        | -0.1615                  | 0.3747             |
| <b>YST</b>                                                                           | <b>ACE</b>         | <b>-0.2952</b>             | <b>0.0614</b> | <b>-0.3862</b>           | <b>&lt; 0.0001</b> |
| <b>LAC</b>                                                                           | <b>ACE</b>         | <b>-0.2628</b>             | <b>0.0617</b> | <b>-0.3475</b>           | <b>&lt; 0.0001</b> |
| <b>ii) Protein content – Male samples</b> (Fisher's C = 1.045, df = 2, p = 0.593)    |                    |                            |               |                          |                    |
| Response                                                                             | Predictor          | Unstandardized coefficient | SE            | Standardized coefficient | P value            |
| Protein                                                                              | ACE                | -1.9905                    | 2.8024        | -0.1138                  | 0.4788             |
| Protein                                                                              | LAC                | -0.4113                    | 3.0130        | -0.0175                  | 0.8916             |
| Protein                                                                              | YST                | 2.0101                     | 3.3455        | 0.0817                   | 0.5490             |
| Protein                                                                              | ACE*LAC            | 1.9296                     | 2.8328        | 0.1265                   | 0.4970             |
| <b>Protein</b>                                                                       | <b>ACE*YST</b>     | <b>4.2620</b>              | <b>2.0236</b> | <b>0.2953</b>            | <b>0.0372</b>      |
| Protein                                                                              | LAC*YST            | 1.0465                     | 1.4651        | 0.1030                   | 0.4764             |
| Protein                                                                              | ACE*LAC*YST        | -1.7050                    | 2.3303        | -0.1291                  | 0.4657             |
| <b>YST</b>                                                                           | <b>ACE</b>         | <b>-0.2398</b>             | <b>0.0582</b> | <b>-0.3374</b>           | <b>0.0001</b>      |
| <b>LAC</b>                                                                           | <b>ACE</b>         | <b>-0.2486</b>             | <b>0.0611</b> | <b>-0.3338</b>           | <b>0.0001</b>      |
| <b>iii) Glucose content – Female samples</b> (Fisher's C = 1.295, df = 2, p = 0.523) |                    |                            |               |                          |                    |
| Response                                                                             | Predictor          | Unstandardized coefficient | SE            | Standardized coefficient | P value            |
| Glucose                                                                              | ACE                | -0.1082                    | 0.0682        | -0.1741                  | 0.1154             |
| Glucose                                                                              | LAC                | 0.0148                     | 0.0709        | 0.0180                   | 0.8350             |
| <b>Glucose</b>                                                                       | <b>YST</b>         | <b>-0.5910</b>             | <b>0.0777</b> | <b>-0.7272</b>           | <b>&lt; 0.0001</b> |
| Glucose                                                                              | ACE*LAC            | 0.0764                     | 0.0639        | 0.1372                   | 0.2346             |
| Glucose                                                                              | ACE*YST            | -0.0795                    | 0.0604        | -0.1536                  | 0.1910             |
| Glucose                                                                              | LAC*YST            | -0.0056                    | 0.0333        | -0.0166                  | 0.8668             |
| Glucose                                                                              | ACE*LAC*YST        | 0.0133                     | 0.0533        | 0.0338                   | 0.8037             |
| <b>YST</b>                                                                           | <b>ACE</b>         | <b>-0.2952</b>             | <b>0.0614</b> | <b>-0.3862</b>           | <b>&lt; 0.0001</b> |
| <b>LAC</b>                                                                           | <b>ACE</b>         | <b>-0.2628</b>             | <b>0.0617</b> | <b>-0.3475</b>           | <b>&lt; 0.0001</b> |
| <b>iv) Glucose content – Male samples</b> (Fisher's C = 1.045, df = 2, p = 0.593)    |                    |                            |               |                          |                    |
| Response                                                                             | Predictor          | Unstandardized coefficient | SE            | Standardized coefficient | P value            |
| Glucose                                                                              | ACE                | -0.0504                    | 0.0462        | -0.0957                  | 0.2777             |
| <b>Glucose</b>                                                                       | <b>LAC</b>         | <b>0.1550</b>              | <b>0.0496</b> | <b>0.2191</b>            | <b>0.0022</b>      |
| <b>Glucose</b>                                                                       | <b>YST</b>         | <b>-0.4220</b>             | <b>0.0551</b> | <b>-0.5693</b>           | <b>&lt; 0.0001</b> |
| <b>Glucose</b>                                                                       | <b>ACE*LAC</b>     | <b>0.1298</b>              | <b>0.0467</b> | <b>0.2825</b>            | <b>0.0063</b>      |
| <b>Glucose</b>                                                                       | <b>ACE*YST</b>     | <b>-0.0822</b>             | <b>0.0333</b> | <b>-0.1892</b>           | <b>0.0150</b>      |
| <b>Glucose</b>                                                                       | <b>LAC*YST</b>     | <b>-0.0648</b>             | <b>0.0241</b> | <b>-0.2117</b>           | <b>0.0083</b>      |
| <b>Glucose</b>                                                                       | <b>ACE*LAC*YST</b> | <b>-0.1350</b>             | <b>0.0385</b> | <b>-0.3393</b>           | <b>0.0006</b>      |
| <b>YST</b>                                                                           | <b>ACE</b>         | <b>-0.2398</b>             | <b>0.0582</b> | <b>-0.3374</b>           | <b>0.0001</b>      |
| <b>LAC</b>                                                                           | <b>ACE</b>         | <b>-0.2486</b>             | <b>0.0611</b> | <b>-0.3338</b>           | <b>0.0001</b>      |

| <b>v) Trehalose content – Female samples</b> (Fisher's C = 1.295, df = 2, p = 0.523)  |                    |                            |               |                          |                    |
|---------------------------------------------------------------------------------------|--------------------|----------------------------|---------------|--------------------------|--------------------|
| Response                                                                              | Predictor          | Unstandardized coefficient | SE            | Standardized coefficient | P value            |
| <b>Trehalose</b>                                                                      | <b>ACE</b>         | <b>-0.2915</b>             | <b>0.0754</b> | <b>-0.5255</b>           | <b>0.0002</b>      |
| <b>Trehalose</b>                                                                      | <b>LAC</b>         | <b>-0.3887</b>             | <b>0.0784</b> | <b>-0.5299</b>           | <b>&lt; 0.0001</b> |
| <b>Trehalose</b>                                                                      | <b>YST</b>         | <b>-0.4483</b>             | <b>0.0858</b> | <b>-0.6178</b>           | <b>&lt; 0.0001</b> |
| Trehalose                                                                             | ACE*LAC            | 0.1031                     | 0.0707        | 0.2075                   | 0.1470             |
| Trehalose                                                                             | ACE*YST            | -0.1020                    | 0.0667        | -0.2207                  | 0.1286             |
| <b>Trehalose</b>                                                                      | <b>LAC*YST</b>     | <b>0.0884</b>              | <b>0.0368</b> | <b>0.2934</b>            | <b>0.0178</b>      |
| <b>Trehalose</b>                                                                      | <b>ACE*LAC*YST</b> | <b>0.1168</b>              | <b>0.0587</b> | <b>0.3329</b>            | <b>0.0487</b>      |
| <b>YST</b>                                                                            | <b>ACE</b>         | <b>-0.2952</b>             | <b>0.0614</b> | <b>-0.3862</b>           | <b>&lt; 0.0001</b> |
| <b>LAC</b>                                                                            | <b>ACE</b>         | <b>-0.2628</b>             | <b>0.0617</b> | <b>-0.3475</b>           | <b>&lt; 0.0001</b> |
| <b>vi) Trehalose content – Male samples</b> (Fisher's C = 1.045, df = 2, p = 0.593)   |                    |                            |               |                          |                    |
| Response                                                                              | Predictor          | Unstandardized coefficient | SE            | Standardized coefficient | P value            |
| Trehalose                                                                             | ACE                | -0.1052                    | 0.0871        | -0.1629                  | 0.2297             |
| <b>Trehalose</b>                                                                      | <b>LAC</b>         | <b>-0.3726</b>             | <b>0.0937</b> | <b>-0.4297</b>           | <b>0.0001</b>      |
| <b>Trehalose</b>                                                                      | <b>YST</b>         | <b>-0.6365</b>             | <b>0.1040</b> | <b>-0.7005</b>           | <b>&lt; 0.0001</b> |
| Trehalose                                                                             | ACE*LAC            | -0.0388                    | 0.0881        | -0.0690                  | 0.6600             |
| Trehalose                                                                             | ACE*YST            | -0.0661                    | 0.0629        | -0.1241                  | 0.2952             |
| <b>Trehalose</b>                                                                      | <b>LAC*YST</b>     | <b>0.1239</b>              | <b>0.0456</b> | <b>0.3302</b>            | <b>0.0075</b>      |
| <b>Trehalose</b>                                                                      | <b>ACE*LAC*YST</b> | <b>0.1495</b>              | <b>0.0725</b> | <b>0.3064</b>            | <b>0.0412</b>      |
| <b>YST</b>                                                                            | <b>ACE</b>         | <b>-0.2398</b>             | <b>0.0582</b> | <b>-0.3374</b>           | <b>0.0001</b>      |
| <b>LAC</b>                                                                            | <b>ACE</b>         | <b>-0.2486</b>             | <b>0.0611</b> | <b>-0.3338</b>           | <b>0.0001</b>      |
| <b>vii) Glycogen content – Female samples</b> (Fisher's C = 1.295, df = 2, p = 0.523) |                    |                            |               |                          |                    |
| Response                                                                              | Predictor          | Unstandardized coefficient | SE            | Standardized coefficient | P value            |
| Glycogen                                                                              | ACE                | -0.0724                    | 0.1345        | -0.0729                  | 0.5914             |
| Glycogen                                                                              | LAC                | 0.1846                     | 0.1399        | 0.1406                   | 0.1893             |
| Glycogen                                                                              | YST                | -0.1517                    | 0.1531        | -0.1168                  | 0.3236             |
| Glycogen                                                                              | ACE*LAC            | 0.1448                     | 0.1261        | 0.1628                   | 0.2530             |
| <b>Glycogen</b>                                                                       | <b>ACE*YST</b>     | <b>-0.3761</b>             | <b>0.1190</b> | <b>-0.4547</b>           | <b>0.0020</b>      |
| <b>Glycogen</b>                                                                       | <b>LAC*YST</b>     | <b>-0.1548</b>             | <b>0.0657</b> | <b>-0.2870</b>           | <b>0.0200</b>      |
| Glycogen                                                                              | ACE*LAC*YST        | -0.0003                    | 0.1047        | -0.0004                  | 0.9979             |
| <b>YST</b>                                                                            | <b>ACE</b>         | <b>-0.2952</b>             | <b>0.0614</b> | <b>-0.3862</b>           | <b>&lt; 0.0001</b> |
| <b>LAC</b>                                                                            | <b>ACE</b>         | <b>-0.2628</b>             | <b>0.0617</b> | <b>-0.3475</b>           | <b>&lt; 0.0001</b> |
| <b>viii) Glycogen content – Male samples</b> (Fisher's C = 1.045, df = 2, p = 0.593)  |                    |                            |               |                          |                    |
| Response                                                                              | Predictor          | Unstandardized coefficient | SE            | Standardized coefficient | P value            |
| <b>Glycogen</b>                                                                       | <b>ACE</b>         | <b>0.3215</b>              | <b>0.1371</b> | <b>0.3303</b>            | <b>0.0206</b>      |
| <b>Glycogen</b>                                                                       | <b>LAC</b>         | <b>0.3444</b>              | <b>0.1470</b> | <b>0.2635</b>            | <b>0.0207</b>      |
| Glycogen                                                                              | YST                | -0.1050                    | 0.1634        | -0.0766                  | 0.5219             |
| Glycogen                                                                              | ACE*LAC            | -0.0384                    | 0.1384        | -0.0453                  | 0.7816             |
| Glycogen                                                                              | ACE*YST            | 0.0056                     | 0.0988        | 0.0069                   | 0.9553             |
| <b>Glycogen</b>                                                                       | <b>LAC*YST</b>     | <b>-0.1444</b>             | <b>0.0715</b> | <b>-0.2553</b>           | <b>0.0456</b>      |
| Glycogen                                                                              | ACE*LAC*YST        | -0.0484                    | 0.1141        | -0.0659                  | 0.6718             |
| <b>YST</b>                                                                            | <b>ACE</b>         | <b>-0.2398</b>             | <b>0.0582</b> | <b>-0.3374</b>           | <b>0.0001</b>      |
| <b>LAC</b>                                                                            | <b>ACE</b>         | <b>-0.2486</b>             | <b>0.0611</b> | <b>-0.3338</b>           | <b>0.0001</b>      |

| <b>ix) TAG content – Female samples</b> (Fisher's C = 1.295, df = 2, p = 0.523) |                |                            |               |                          |                    |
|---------------------------------------------------------------------------------|----------------|----------------------------|---------------|--------------------------|--------------------|
| Response                                                                        | Predictor      | Unstandardized coefficient | SE            | Standardized coefficient | P value            |
| <b>TAG</b>                                                                      | <b>ACE</b>     | <b>-0.8619</b>             | <b>0.4261</b> | <b>-0.2779</b>           | <b>0.0453</b>      |
| TAG                                                                             | LAC            | -0.1071                    | 0.4429        | -0.0261                  | 0.8094             |
| TAG                                                                             | YST            | 0.0214                     | 0.4852        | 0.0053                   | 0.9648             |
| TAG                                                                             | ACE*LAC        | -0.2136                    | 0.3994        | -0.0769                  | 0.5938             |
| TAG                                                                             | ACE*YST        | -0.0476                    | 0.3776        | -0.0184                  | 0.8999             |
| TAG                                                                             | LAC*YST        | 0.3802                     | 0.2082        | 0.2256                   | 0.0702             |
| TAG                                                                             | ACE*LAC*YST    | -0.0362                    | 0.3327        | -0.0185                  | 0.9135             |
| <b>YST</b>                                                                      | <b>ACE</b>     | <b>-0.2952</b>             | <b>0.0614</b> | <b>-0.3862</b>           | <b>&lt; 0.0001</b> |
| <b>LAC</b>                                                                      | <b>ACE</b>     | <b>-0.2628</b>             | <b>0.0617</b> | <b>-0.3475</b>           | <b>&lt; 0.0001</b> |
| <b>x) TAG content – Male samples</b> (Fisher's C = 0.988, df = 2, p = 0.61)     |                |                            |               |                          |                    |
| Response                                                                        | Predictor      | Unstandardized coefficient | SE            | Standardized coefficient | P value            |
| TAG                                                                             | ACE            | 0.0026                     | 0.4246        | 0.0004                   | 0.9952             |
| TAG                                                                             | LAC            | -0.4702                    | 0.4553        | -0.0551                  | 0.3037             |
| <b>TAG</b>                                                                      | <b>YST</b>     | <b>6.3893</b>              | <b>0.5064</b> | <b>0.7152</b>            | <b>&lt; 0.0001</b> |
| TAG                                                                             | ACE*LAC        | -0.7518                    | 0.4287        | -0.1352                  | 0.0820             |
| <b>TAG</b>                                                                      | <b>ACE*YST</b> | <b>0.6317</b>              | <b>0.3061</b> | <b>0.1201</b>            | <b>0.0411</b>      |
| <b>TAG</b>                                                                      | <b>LAC*YST</b> | <b>0.8681</b>              | <b>0.2215</b> | <b>0.2344</b>            | <b>0.0001</b>      |
| TAG                                                                             | ACE*LAC*YST    | 0.6113                     | 0.3535        | 0.1268                   | 0.0862             |
| <b>YST</b>                                                                      | <b>ACE</b>     | <b>-0.2398</b>             | <b>0.0582</b> | <b>-0.3400</b>           | <b>0.0001</b>      |
| <b>LAC</b>                                                                      | <b>ACE</b>     | <b>-0.2486</b>             | <b>0.0611</b> | <b>-0.3369</b>           | <b>0.0001</b>      |

P-values below the threshold are bolded.

Table S1F. Effect of administered microbial fermentation products on *Drosophila* feeding, survival, weight, and nutritional indices

| <b>i) Metabolite effect on feeding by day</b>   |                                                     |                                                     |                                                     |                                                     |
|-------------------------------------------------|-----------------------------------------------------|-----------------------------------------------------|-----------------------------------------------------|-----------------------------------------------------|
| <i>ANOVA effect test (Type III ANOVA)</i>       | <i>Ethanol (sqrt-transformed)</i>                   | <i>Acetic acid</i>                                  | <i>Lactic acid</i>                                  | <i>Acetoin</i>                                      |
| Concentration                                   | $F_{2,100} = 1.46$ ,<br>$p = 0.2362$                | $F_{2,100} = 26.02$ ,<br>$p = 8.0 \times 10^{-10}$  | $F_{2,103} = 41.41$ ,<br>$p = 6.4 \times 10^{-14}$  | $F_{2,100} = 2.57$ ,<br>$p = 0.0817$                |
| Sex                                             | $F_{1,100} = 204.93$ ,<br>$p < 2.2 \times 10^{-16}$ | $F_{1,100} = 114.84$ ,<br>$p < 2.2 \times 10^{-16}$ | $F_{1,102} = 138.09$ ,<br>$p < 2.2 \times 10^{-16}$ | $F_{1,100} = 50.98$ ,<br>$p = 1.5 \times 10^{-10}$  |
| Day                                             | $F_{3,306} = 318.40$ ,<br>$p < 2.2 \times 10^{-16}$ | $F_{3,306} = 388.81$ ,<br>$p < 2.2 \times 10^{-16}$ | $F_{3,300} = 138.09$ ,<br>$p < 2.2 \times 10^{-16}$ | $F_{3,306} = 301.96$ ,<br>$p < 2.2 \times 10^{-16}$ |
| Concentration*Sex                               | $F_{2,100} = 0.29$ ,<br>$p = 0.7489$                | $F_{2,100} = 0.77$ ,<br>$p = 0.4668$                | $F_{2,102} = 0.73$ ,<br>$p = 0.4863$                | $F_{2,100} = 3.33$ ,<br>$p = 0.0397$                |
| Concentration*Day                               | $F_{6,306} = 4.06$ ,<br>$p = 0.0006$                | $F_{6,306} = 1.33$ ,<br>$p = 0.2454$                | $F_{6,300} = 4.05$ ,<br>$p = 0.0006$                | $F_{6,306} = 2.94$ ,<br>$p = 0.0084$                |
| Sex*Day                                         | $F_{3,306} = 42.62$ ,<br>$p < 2.2 \times 10^{-16}$  | $F_{3,306} = 56.17$ ,<br>$p < 2.2 \times 10^{-16}$  | $F_{3,301} = 57.15$ ,<br>$p < 2.2 \times 10^{-16}$  | $F_{3,306} = 9.49$ ,<br>$p = 5.2 \times 10^{-6}$    |
| Concentration*Sex*Day                           | $F_{6,306} = 1.13$ ,<br>$p = 0.3462$                | $F_{6,306} = 0.96$ ,<br>$p = 0.4561$                | $F_{6,300} = 1.02$ ,<br>$p = 0.4108$                | $F_{6,306} = 2.18$ ,<br>$p = 0.0452$                |
| <b>Analysis of deviance</b>                     |                                                     |                                                     |                                                     |                                                     |
| Experimental replicate                          | $\chi^2_1 = 6.855$ ,<br>$p = 0.0088$                | $\chi^2_1 = 2.054$ ,<br>$p = 0.1519$                | $\chi^2_1 = 0.561$ ,<br>$p = 0.4537$                | $\chi^2_1 = 98.164$ ,<br>$p < 2.2 \times 10^{-16}$  |
| <b>R<sup>2</sup></b>                            |                                                     |                                                     |                                                     |                                                     |
| Marginal                                        | 0.741                                               | 0.765                                               | 0.782                                               | 0.503                                               |
| Conditional                                     | 0.766                                               | 0.792                                               | 0.799                                               | 0.801                                               |
| <b>ii) Metabolite effect on final survival</b>  |                                                     |                                                     |                                                     |                                                     |
| <i>Effect test (Wald's <math>\chi^2</math>)</i> | <i>Ethanol</i>                                      | <i>Acetic acid</i>                                  | <i>Lactic acid</i>                                  | <i>Acetoin</i>                                      |
| Concentration                                   | $\chi^2_2 = 7.686$ ,<br>$p = 0.0214$                | $\chi^2_2 = 11.859$ ,<br>$p = 0.0027$               | $\chi^2_2 = 9.470$ ,<br>$p = 0.0088$                | $\chi^2_2 = 1.575$ ,<br>$p = 0.4550$                |
| Sex                                             | $\chi^2_1 = 2.148$ ,<br>$p = 0.1428$                | $\chi^2_1 = 0.582$ ,<br>$p = 0.4457$                | $\chi^2_1 = 6.066$ ,<br>$p = 0.0138$                | $\chi^2_1 = 0.076$ ,<br>$p = 0.7834$                |
| Concentration*Sex                               | $\chi^2_2 = 1.620$ ,<br>$p = 0.4448$                | $\chi^2_2 = 5.382$ ,<br>$p = 0.0678$                | $\chi^2_2 = 2.536$ ,<br>$p = 0.2815$                | $\chi^2_2 = 3.752$ ,<br>$p = 0.1532$                |
| Total food consumed                             | $\chi^2_1 = 1.807$ ,<br>$p = 0.1789$                | $\chi^2_1 = 0.000$ ,<br>$p = 0.9955$                | $\chi^2_1 = 4.535$ ,<br>$p = 0.0332$                | $\chi^2_1 = 3.146$ ,<br>$p = 0.0761$                |
| <b>Analysis of deviance</b>                     |                                                     |                                                     |                                                     |                                                     |
| Experimental replicate                          | $\chi^2_1 = 0$ ,<br>$p = 0.9999$                    | $\chi^2_1 = 2.864$ ,<br>$p = 0.091$                 | $\chi^2_1 = 6.235$ ,<br>$p = 0.0125$                | $\chi^2_1 = 0$ ,<br>$p = 0.9992$                    |
| <b>iii) Metabolite effect on fly weight</b>     |                                                     |                                                     |                                                     |                                                     |
| <i>ANOVA effect test (Type II ANOVA)</i>        | <i>Ethanol (sqrt-transformed)</i>                   | <i>Acetic acid (sqrt-transformed)</i>               | <i>Lactic acid</i>                                  | <i>Acetoin</i>                                      |
| Concentration                                   | $F_{2,99} = 0.119$ ,<br>$p = 0.8883$                | $F_{2,100} = 6.102$ ,<br>$p = 0.0032$               | $F_{2,87} = 1.434$ ,<br>$p = 0.2439$                | $F_{2,100} = 2.584$ ,<br>$p = 0.0805$               |
| Sex                                             | $F_{1,101} = 39.105$ ,<br>$p = 9.8 \times 10^{-9}$  | $F_{1,101} = 63.300$ ,<br>$p = 2.7 \times 10^{-12}$ | $F_{1,88} = 9.188$ ,<br>$p = 0.0032$                | $F_{1,96} = 83.452$ ,<br>$p = 1.1 \times 10^{-14}$  |
| Concentration*Sex                               | $F_{2,99} = 0.892$ ,<br>$p = 0.4130$                | $F_{2,99} = 4.647$ ,<br>$p = 0.0118$                | $F_{2,86} = 0.460$ ,<br>$p = 0.6331$                | $F_{2,100} = 0.761$ ,<br>$p = 0.4699$               |

|                                                 |                                                                  |                                                                     |                                                                    |                                                                     |
|-------------------------------------------------|------------------------------------------------------------------|---------------------------------------------------------------------|--------------------------------------------------------------------|---------------------------------------------------------------------|
| Total food consumed                             | $F_{1,101} = 0.509$ , $p = 0.4770$                               | $F_{1,101} = \mathbf{5.060}$ , $p = \mathbf{0.0267}$                | $F_{1,87} = 1.494$ , $p = 0.2248$                                  | $F_{1,38} = 2.764$ , $p = 0.1046$                                   |
| <b>Analysis of deviance</b>                     |                                                                  |                                                                     |                                                                    |                                                                     |
| Experimental replicate                          | $\chi^2_1 = \mathbf{5.182}$ , $p = \mathbf{0.0228}$              | $\chi^2_1 = 0.636$ , $p = 0.4253$                                   | $\chi^2_1 = 0$ , $p = 1$                                           | $\chi^2_1 = 0.081$ , $p = 0.7759$                                   |
| <b>R<sup>2</sup></b>                            |                                                                  |                                                                     |                                                                    |                                                                     |
| Marginal                                        | 0.487                                                            | 0.488                                                               | 0.363                                                              | 0.474                                                               |
| Conditional                                     | 0.562                                                            | 0.510                                                               | 0.371                                                              | 0.564                                                               |
| <b>iv) Metabolite effect on TAG content</b>     |                                                                  |                                                                     |                                                                    |                                                                     |
| <b>ANOVA effect test (Type II ANOVA)</b>        | <b>Ethanol</b>                                                   | <b>Acetic acid</b>                                                  | <b>Lactic acid</b>                                                 | <b>Acetoin</b>                                                      |
| Concentration                                   | $F_{2,98.32} = 0.073$ , $p = 0.9293$                             | $F_{2,99.32} = \mathbf{5.822}$ , $p = \mathbf{0.0041}$              | $F_{2,85.69} = 1.180$ , $p = 0.3122$                               | $F_{2,99.04} = 0.775$ , $p = 0.4636$                                |
| Sex                                             | $F_{1,75.92} = 3.606$ , $p = 0.0614$                             | $F_{1,97.97} = 3.124$ , $p = 0.0803$                                | $F_{1,85.66} = 3.393$ , $p = 0.0689$                               | $F_{1,83.94} = 2.617$ , $p = 0.1095$                                |
| Concentration*Sex                               | $F_{2,98.02} = 0.128$ , $p = 0.8805$                             | $F_{2,98.31} = 0.786$ , $p = 0.4587$                                | $F_{2,85.01} = 2.976$ , $p = 0.0563$                               | $F_{2,99.04} = 0.459$ , $p = 0.6335$                                |
| Total food consumed                             | $F_{1,88.47} = 0.055$ , $p = 0.8148$                             | $F_{1,91.07} = 1.134$ , $p = 0.2897$                                | $F_{1,85.56} = 1.844$ , $p = 0.1781$                               | $F_{1,22.59} = 1.703$ , $p = 0.2050$                                |
| Weight fly <sup>-1</sup>                        | $F_{1,91.85} = \mathbf{8.477}$ , $p = \mathbf{0.0045}$           | $F_{1,98.79} = \mathbf{49.98}$ , $p = \mathbf{2.2 \times 10^{-10}}$ | $F_{1,85.43} = \mathbf{41.40}$ , $p = \mathbf{7.0 \times 10^{-9}}$ | $F_{1, 99.90} = \mathbf{33.19}$ , $p = \mathbf{9.3 \times 10^{-8}}$ |
| <b>Analysis of deviance</b>                     |                                                                  |                                                                     |                                                                    |                                                                     |
| Experimental replicate                          | $\chi^2_1 = 0.089$ , $p = 0.765$                                 | $\chi^2_1 = 0$ , $p = 1$                                            | $\chi^2_1 = \mathbf{15.017}$ , $p = \mathbf{0.0001}$               | $\chi^2_1 = 0.043$ , $p = 0.8353$                                   |
| <b>R<sup>2</sup></b>                            |                                                                  |                                                                     |                                                                    |                                                                     |
| Marginal                                        | 0.320                                                            | 0.436                                                               | 0.350                                                              | 0.341                                                               |
| Conditional                                     | 0.338                                                            | 0.441                                                               | 0.524                                                              | 0.426                                                               |
| <b>v) Metabolite effect on glucose content</b>  |                                                                  |                                                                     |                                                                    |                                                                     |
| <b>ANOVA effect test (Type II ANOVA)</b>        | <b>Ethanol</b>                                                   | <b>Acetic acid</b>                                                  | <b>Lactic acid</b>                                                 | <b>Acetoin</b>                                                      |
| Concentration                                   | $F_{2,98.09} = 0.759$ , $p = 0.4709$                             | $F_{2,98.95} = 0.628$ , $p = 0.5359$                                | $F_{2,84.01} = 3.784$ , $p = 0.0267$                               | $F_{2,98.57} = 0.994$ , $p = 0.3739$                                |
| Sex                                             | $F_{1,99} = \mathbf{42.031}$ , $p = \mathbf{3.5 \times 10^{-9}}$ | $F_{1,100} = \mathbf{28.913}$ , $p = \mathbf{5.0 \times 10^{-7}}$   | $F_{1,83.9} = \mathbf{32.465}$ , $p = \mathbf{1.8 \times 10^{-7}}$ | $F_{1,98.6} = \mathbf{15.587}$ , $p = \mathbf{0.0001}$              |
| Concentration*Sex                               | $F_{2,98.00} = 2.178$ , $p = 0.1188$                             | $F_{2,98.16} = 0.024$ , $p = 0.9760$                                | $F_{2,85.13} = 0.872$ , $p = 0.4218$                               | $F_{2,98.57} = \mathbf{4.831}$ , $p = \mathbf{0.0100}$              |
| Total food consumed                             | $F_{1,100} = \mathbf{4.219}$ , $p = \mathbf{0.0426}$             | $F_{1,99} = \mathbf{11.685}$ , $p = \mathbf{0.0009}$                | $F_{1,85.25} = 2.894$ , $p = 0.0926$                               | $F_{1,69.81} = 2.483$ , $p = 0.1196$                                |
| Weight fly <sup>-1</sup>                        | $F_{1,99.94} = 3.501$ , $p = 0.0643$                             | $F_{1,99.97} = \mathbf{5.213}$ , $p = \mathbf{0.0245}$              | $F_{1,86.67} = \mathbf{5.572}$ , $p = \mathbf{0.0205}$             | $F_{1,99.6} = \mathbf{44.592}$ , $p = \mathbf{1.4 \times 10^{-9}}$  |
| <b>Analysis of deviance</b>                     |                                                                  |                                                                     |                                                                    |                                                                     |
| Experimental replicate                          | $\chi^2_1 = \mathbf{7.610}$ , $p = \mathbf{0.0058}$              | $\chi^2_1 = 0.556$ , $p = 0.4558$                                   | $\chi^2_1 = 0$ , $p = 1$                                           | $\chi^2_1 = \mathbf{12.286}$ , $p = \mathbf{0.0005}$                |
| <b>R<sup>2</sup></b>                            |                                                                  |                                                                     |                                                                    |                                                                     |
| Marginal                                        | 0.535                                                            | 0.476                                                               | 0.576                                                              | 0.575                                                               |
| Conditional                                     | 0.612                                                            | 0.499                                                               | 0.576                                                              | 0.708                                                               |
| <b>vi) Metabolite effect on protein content</b> |                                                                  |                                                                     |                                                                    |                                                                     |
| <b>ANOVA effect test (Type II ANOVA)</b>        | <b>Ethanol</b>                                                   | <b>Acetic acid</b>                                                  | <b>Lactic acid</b>                                                 | <b>Acetoin</b>                                                      |

|                             |                                                                                    |                                                                                         |                                                                                    |                                        |
|-----------------------------|------------------------------------------------------------------------------------|-----------------------------------------------------------------------------------------|------------------------------------------------------------------------------------|----------------------------------------|
| Concentration               | $F_{2,98.09} = 2.223,$<br>$p = 0.1137$                                             | <b><math>F_{2,99.29} = 7.939,</math></b><br><b><math>p = 0.0006</math></b>              | $F_{2,85.5} = 2.874,$ $p = 0.0619$                                                 | $F_{2,99.44} = 0.763,$<br>$p = 0.4690$ |
| Sex                         | <b><math>F_{1,99.8} = 38.28,</math></b> <b><math>p = 1.4 \times 10^{-8}</math></b> | <b><math>F_{1,95.1} = 60.998,</math></b><br><b><math>p = 7.5 \times 10^{-12}</math></b> | <b><math>F_{1,86} = 35.555,</math></b> <b><math>p = 5.3 \times 10^{-8}</math></b>  | $F_{1,54.03} = 3.839,$<br>$p = 0.0553$ |
| Concentration*Sex           | $F_{2,98.00} = 1.184,$<br>$p = 0.3103$                                             | $F_{2,98.40} = 0.295,$ $p = 0.7452$                                                     | <b><math>F_{2,85.09} = 5.598,</math></b><br><b><math>p = 0.0052</math></b>         | $F_{2,99.43} = 0.795,$<br>$p = 0.4545$ |
| Total food consumed         | $F_{1,100} = 3.117,$ $p = 0.0805$                                                  | $F_{1,83.09} = 0.085,$ $p = 0.7714$                                                     | $F_{1,86.60} = 1.804,$ $p = 0.1826$                                                | $F_{1,2.67} = 0.500,$ $p = 0.5362$     |
| Weight fly <sup>-1</sup>    | $F_{1,100} = 0.273,$ $p = 0.6023$                                                  | <b><math>F_{1,96.5} = 38.171,</math></b><br><b><math>p = 1.5 \times 10^{-8}</math></b>  | <b><math>F_{1,87} = 87.384,</math></b> <b><math>p = 8.7 \times 10^{-15}</math></b> | $F_{1,98.43} = 0.169,$<br>$p = 0.6821$ |
| <i>Analysis of deviance</i> |                                                                                    |                                                                                         |                                                                                    |                                        |
| Experimental replicate      | $\chi^2_1 = 6.976,$<br><b><math>p = 0.00826</math></b>                             | $\chi^2_1 = 0,$<br>$p = 1$                                                              | $\chi^2_1 = 0,$<br>$p = 1$                                                         | $\chi^2_1 = 0,$<br>$p = 1$             |
| <i>R</i> <sup>2</sup>       |                                                                                    |                                                                                         |                                                                                    |                                        |
| Marginal                    | 0.633                                                                              | 0.814                                                                                   | 0.799                                                                              | 0.105                                  |
| Conditional                 | 0.693                                                                              | 0.814                                                                                   | 0.802                                                                              | 0.106                                  |

P-values below the threshold are bolded.

Table S1G. Effect of microbiota member presence on SCFA content

| Analysis categories      | Acetic acid                                                                                                          | Propionic acid                                                                                                       | Butyric acid                                                                                                         | Total                                                                                                                |
|--------------------------|----------------------------------------------------------------------------------------------------------------------|----------------------------------------------------------------------------------------------------------------------|----------------------------------------------------------------------------------------------------------------------|----------------------------------------------------------------------------------------------------------------------|
| <b>Tukey test</b>        |                                                                                                                      |                                                                                                                      |                                                                                                                      |                                                                                                                      |
| Axenic-F                 | AB                                                                                                                   | AB                                                                                                                   | AB                                                                                                                   | AB                                                                                                                   |
| Axenic-M                 | a                                                                                                                    | a                                                                                                                    | b                                                                                                                    | a                                                                                                                    |
| ACE-F                    | B                                                                                                                    | B                                                                                                                    | B                                                                                                                    | B                                                                                                                    |
| ACE-M                    | a                                                                                                                    | a                                                                                                                    | b                                                                                                                    | a                                                                                                                    |
| LAC-F                    | AB                                                                                                                   | AB                                                                                                                   | AB                                                                                                                   | AB                                                                                                                   |
| LAC-M                    | a                                                                                                                    | a                                                                                                                    | b                                                                                                                    | a                                                                                                                    |
| YST-F                    | AB                                                                                                                   | A                                                                                                                    | A                                                                                                                    | A                                                                                                                    |
| YST-M                    | a                                                                                                                    | a                                                                                                                    | a                                                                                                                    | a                                                                                                                    |
| ACE+LAC-F                | AB                                                                                                                   | AB                                                                                                                   | AB                                                                                                                   | AB                                                                                                                   |
| ACE+LAC-M                | a                                                                                                                    | a                                                                                                                    | b                                                                                                                    | a                                                                                                                    |
| ACE+YST-F                | A                                                                                                                    | AB                                                                                                                   | B                                                                                                                    | AB                                                                                                                   |
| ACE+YST-M                | a                                                                                                                    | a                                                                                                                    | ab                                                                                                                   | a                                                                                                                    |
| LAC+YST-F                | AB                                                                                                                   | AB                                                                                                                   | AB                                                                                                                   | AB                                                                                                                   |
| LAC+YST-M                | a                                                                                                                    | a                                                                                                                    | ab                                                                                                                   | a                                                                                                                    |
| ACE+LAC+YST-F            | AB                                                                                                                   | AB                                                                                                                   | AB                                                                                                                   | AB                                                                                                                   |
| ACE+LAC+YST-M            | a                                                                                                                    | a                                                                                                                    | ab                                                                                                                   | a                                                                                                                    |
| <b>ANOVA Effect test</b> |                                                                                                                      |                                                                                                                      |                                                                                                                      |                                                                                                                      |
| sex                      | $F_{1,39.34} = 0.0025$ ,<br>$p = 0.9607$ ,<br>$\omega^2 = -0.015$                                                    | $F_{1,39.33} = 0.0881$ ,<br>$p = 0.7681$ ,<br>$\omega^2 = -0.012$                                                    | $F_{1,39.35} = 0.0635$ ,<br>$p = 0.8023$ ,<br>$\omega^2 = -0.011$                                                    | $F_{1,39.29} = 0.0704$ ,<br>$p = 0.7921$ ,<br>$\omega^2 = -0.013$                                                    |
| ACE                      | $F_{1,37.91} = 0.3776$ ,<br>$p = 0.5424$ ,<br>$\omega^2 = -0.010$                                                    | $F_{1,39.91} = 0.1708$ ,<br>$p = 0.6816$ ,<br>$\omega^2 = -0.011$                                                    | $F_{1,39.90} = 3.1695$ ,<br>$p = 0.0826$ ,<br>$\omega^2 = 0.025$                                                     | $F_{1,39.93} = 0.0010$ ,<br>$p = 0.9747$ ,<br>$\omega^2 = -0.014$                                                    |
| LAC                      | $F_{1,37.91} = 0.8531$ ,<br>$p = 0.3612$ ,<br>$\omega^2 = -0.003$                                                    | $F_{1,39.91} = 1.0488$ ,<br>$p = 0.3120$ ,<br>$\omega^2 = 4.5e-06$                                                   | $F_{1,39.90} = 0.6764$ ,<br>$p = 0.4157$ ,<br>$\omega^2 = -0.004$                                                    | $F_{1,39.93} = 1.1419$ ,<br>$p = 0.2917$ ,<br>$\omega^2 = 0.001$                                                     |
| YST                      | <b><math>F_{1,37.91} = 9.1564</math>,</b><br><b><math>p = 0.0043</math>,</b><br><b><math>\omega^2 = 0.125</math></b> | <b><math>F_{1,39.91} = 8.3138</math>,</b><br><b><math>p = 0.0063</math>,</b><br><b><math>\omega^2 = 0.093</math></b> | <b><math>F_{1,39.90} = 18.024</math>,</b><br><b><math>p = 0.0001</math>,</b><br><b><math>\omega^2 = 0.197</math></b> | <b><math>F_{1,39.93} = 10.511</math>,</b><br><b><math>p = 0.0024</math>,</b><br><b><math>\omega^2 = 0.136</math></b> |
| ACE*sex                  | $F_{1,39.38} = 1.5957$ ,<br>$p = 0.2139$ ,<br>$\omega^2 = 0.008$                                                     | <b><math>F_{1,39.37} = 14.659</math>,</b><br><b><math>p = 0.0005</math>,</b><br><b><math>\omega^2 = 0.178</math></b> | $F_{1,39.40} = 1.5576$ ,<br>$p = 0.2194$ ,<br>$\omega^2 = 0.007$                                                     | <b><math>F_{1,39.32} = 6.9104</math>,</b><br><b><math>p = 0.0122</math>,</b><br><b><math>\omega^2 = 0.085</math></b> |
| LAC*sex                  | $F_{1,39.38} = 0.0064$ ,<br>$p = 0.9365$ ,<br>$\omega^2 = -0.015$                                                    | $F_{1,39.37} = 0.0027$ ,<br>$p = 0.9590$ ,<br>$\omega^2 = -0.013$                                                    | $F_{1,39.40} = 2.0504$ ,<br>$p = 0.1601$ ,<br>$\omega^2 = 0.012$                                                     | $F_{1,39.32} = 0.0068$ ,<br>$p = 0.9345$ ,<br>$\omega^2 = -0.014$                                                    |
| YST*sex                  | $F_{1,39.38} = 1.3405$ ,<br>$p = 0.2539$ ,<br>$\omega^2 = 0.004$                                                     | $F_{1,39.37} = 1.3654$ ,<br>$p = 0.2496$ ,<br>$\omega^2 = 0.005$                                                     | <b><math>F_{1,39.40} = 7.9497</math>,</b><br><b><math>p = 0.0075</math>,</b><br><b><math>\omega^2 = 0.082</math></b> | $F_{1,39.32} = 0.0125$ ,<br>$p = 0.9117$ ,<br>$\omega^2 = -0.014$                                                    |
| ACE*LAC                  | $F_{1,39.92} = 1.9286$ ,<br>$p = 0.1726$ ,<br>$\omega^2 = 0.014$                                                     | <b><math>F_{1,39.93} = 5.7471</math>,</b><br><b><math>p = 0.0213</math>,</b><br><b><math>\omega^2 = 0.062</math></b> | $F_{1,39.92} = 0.8445$ ,<br>$p = 0.3636$ ,<br>$\omega^2 = -0.002$                                                    | $F_{1,39.94} = 3.7050$ ,<br>$p = 0.0614$ ,<br>$\omega^2 = 0.039$                                                     |
| ACE*YST                  | $F_{1,39.92} = 3.2895$ ,<br>$p = 0.0772$ ,<br>$\omega^2 = 0.035$                                                     | $F_{1,39.93} = 0.1624$ ,<br>$p = 0.6891$ ,<br>$\omega^2 = -0.011$                                                    | $F_{1,39.92} = 1.8160$ ,<br>$p = 0.1854$ ,<br>$\omega^2 = 0.009$                                                     | $F_{1,37.95} = 1.1702$ ,<br>$p = 0.2858$ ,<br>$\omega^2 = 0.003$                                                     |
| LAC*YST                  | $F_{1,39.92} = 1.0515$ ,<br>$p = 0.3113$ ,<br>$\omega^2 = 0.001$                                                     | $F_{1,39.93} = 2.8748$ ,<br>$p = 0.0978$ ,<br>$\omega^2 = 0.024$                                                     | $F_{1,39.92} = 1.7766$ ,<br>$p = 0.1901$ ,<br>$\omega^2 = 0.009$                                                     | $F_{1,39.94} = 2.6080$ ,<br>$p = 0.1142$ ,<br>$\omega^2 = 0.023$                                                     |
| ACE*LAC*sex              | $F_{1,39.40} = 0.1534$ ,                                                                                             | $F_{1,39.40} = 1.3125$ ,                                                                                             | <b><math>F_{1,39.42} = 4.2188</math>,</b>                                                                            | $F_{1,39.35} = 0.0017$ ,                                                                                             |



|                                    |                                                                                                     |                                                               |                                                                          |                                                                                                     |
|------------------------------------|-----------------------------------------------------------------------------------------------------|---------------------------------------------------------------|--------------------------------------------------------------------------|-----------------------------------------------------------------------------------------------------|
|                                    | p = 0.6975,<br>$\omega^2 = -0.013$                                                                  | p = 0.2589,<br>$\omega^2 = 0.004$                             | <b><i>p = 0.0467,</i></b><br><b><i><math>\omega^2 = 0.038</math></i></b> | p = 0.9671,<br>$\omega^2 = -0.014$                                                                  |
| ACE*YST*sex                        | $F_{1,39.40} = 0.4364,$<br>p = 0.5127,<br>$\omega^2 = -0.008$                                       | $F_{1,39.40} = 0.0809,$<br>p = 0.7776,<br>$\omega^2 = -0.012$ | $F_{1,39.42} = 0.5096,$<br>p = 0.4795,<br>$\omega^2 = -0.006$            | $F_{1,39.35} = 0.1985,$<br>p = 0.6584,<br>$\omega^2 = -0.011$                                       |
| LAC*YST*sex                        | $F_{1,39.40} = 0.3572,$<br>p = 0.5535,<br>$\omega^2 = -0.010$                                       | $F_{1,39.40} = 0.4912,$<br>p = 0.4875,<br>$\omega^2 = -0.007$ | $F_{1,39.42} = 0.0219,$<br>p = 0.8830,<br>$\omega^2 = -0.012$            | $F_{1,39.35} = 0.4627,$<br>p = 0.5004,<br>$\omega^2 = -0.008$                                       |
| ACE*LAC*YST                        | $F_{1,39.93} = 0.4910,$<br>p = 0.4875,<br>$\omega^2 = -0.008$                                       | $F_{1,39.93} = 0.0063,$<br>p = 0.9370,<br>$\omega^2 = -0.013$ | $F_{1,39.93} = 1.5815,$<br>p = 0.2158,<br>$\omega^2 = 0.007$             | $F_{1,39.95} = 0.0252,$<br>p = 0.8746,<br>$\omega^2 = -0.014$                                       |
| ACE*LAC*YST*sex                    | $F_{1,39.42} = 3.6614,$<br><b><i>p = 0.0630,</i></b><br><b><i><math>\omega^2 = 0.041</math></i></b> | $F_{1,39.41} = 0.1656,$<br>p = 0.6863,<br>$\omega^2 = -0.011$ | $F_{1,39.44} = 0.1699,$<br>p = 0.6824,<br>$\omega^2 = -0.010$            | $F_{1,39.36} = 2.0081,$<br><b><i>p = 0.1643,</i></b><br><b><i><math>\omega^2 = 0.015</math></i></b> |
| <b><i>Analysis of Deviance</i></b> |                                                                                                     |                                                               |                                                                          |                                                                                                     |
| Vial replicate                     | <b><math>X^2_1 = 14.40,</math></b><br><b>p = 0.0001</b>                                             | <b><math>X^2_1 = 13.20,</math></b><br><b>p = 0.0003</b>       | <b><math>X^2_1 = 12.88,</math></b><br><b>p = 0.0003</b>                  | <b><math>X^2_1 = 19.23,</math></b><br><b>p = 1.16 x 10<sup>-5</sup></b>                             |
| <b><i>R<sup>2</sup></i></b>        |                                                                                                     |                                                               |                                                                          |                                                                                                     |
| Marginal                           | 0.244                                                                                               | 0.274                                                         | 0.341                                                                    | 0.262                                                                                               |
| Conditional                        | 0.586                                                                                               | 0.649                                                         | 0.662                                                                    | 0.695                                                                                               |

The *post hoc* Tukey test was implemented to assess differences in SCFA content between treatments for each sex. Uppercase letters are used to represent the ranking of female samples and lowercase letters are used to distinguish the rankings for male samples. Significant p-values were bolded and influential effect sizes were italicized. P-values below the threshold are bolded.

Table S1H. Moderation effect of individual SCFA content and microbiota members on individual nutritional indices

| <b>i) TAG ~ Acetate</b>      |                                                |                                                  |
|------------------------------|------------------------------------------------|--------------------------------------------------|
| <i>ANOVA Effect test</i>     | <i>Female</i>                                  | <i>Male</i>                                      |
| ACE                          | $F_{1,29.11} = 7.954, p = 0.0086$              | $F_{1,30.06} = 55.596, p = 2.6 \times 10^{-8}$   |
| LAC                          | $F_{1,29.02} = 0.166, p = 0.6864$              | $F_{1,30.01} = 0.225, p = 0.6390$                |
| YST                          | $F_{1,29.22} = 4.527, p = 0.0419$              | $F_{1,30.16} = 602.769, p < 2.2 \times 10^{-16}$ |
| [Acetate]                    | $F_{1,30.22} = 0.455, p = 0.5049$              | $F_{1,31.80} = 1.755, p = 0.1948$                |
| ACE*[Acetate]                | $F_{1,29.16} = 0.647, p = 0.4276$              | $F_{1,30.01} = 23.248, p = 3.9 \times 10^{-5}$   |
| LAC*[Acetate]                | $F_{1,29.36} = 1.212, p = 0.2798$              | $F_{1,31.12} = 0.170, p = 0.6831$                |
| YST*[Acetate]                | $F_{1,29.22} = 0.271, p = 0.6064$              | $F_{1,30.28} = 0.416, p = 0.5240$                |
| ACE*LAC                      | $F_{1,29.03} = 0.146, p = 0.7048$              | $F_{1,30.06} = 12.789, p = 0.0012$               |
| ACE*YST                      | $F_{1,29.27} = 0.055, p = 0.8166$              | $F_{1,30.09} = 23.741, p = 3.3 \times 10^{-5}$   |
| LAC*YST                      | $F_{1,29.07} = 1.623, p = 0.2127$              | $F_{1,30.42} = 21.530, p = 6.2 \times 10^{-5}$   |
| ACE*LAC*[Acetate]            | $F_{1,29.00} = 0.580, p = 0.4524$              | $F_{1,30.86} = 4.630, p = 0.0394$                |
| ACE*YST*[Acetate]            | $F_{1,29.53} = 0.080, p = 0.7797$              | $F_{1,31.03} = 17.940, p = 0.0002$               |
| LAC*YST*[Acetate]            | $F_{1,29.41} = 0.914, p = 0.3468$              | $F_{1,30.10} = 1.793, p = 0.1906$                |
| ACE*LAC*YST                  | $F_{1,29.06} = 0.727, p = 0.4010$              | $F_{1,30.28} = 4.781, p = 0.0366$                |
| ACE*LAC*YST*[Acetate]        | $F_{1,29.56} = 2.103, p = 0.1576$              | $F_{1,30.33} = 0.691, p = 0.4125$                |
| <i>Analysis of Deviance</i>  |                                                |                                                  |
| Experimental replicate       | $X^2_1 = 11.45,$<br>$p = 0.0007$               | $X^2_1 = 5.73,$<br>$p = 0.0167$                  |
| <i>R<sup>2</sup></i>         |                                                |                                                  |
| Marginal                     | 0.233                                          | 0.929                                            |
| Conditional                  | 0.532                                          | 0.946                                            |
| <b>ii) Glucose ~ Acetate</b> |                                                |                                                  |
| <i>ANOVA Effect test</i>     | <i>Female (ln-transformed)</i>                 | <i>Male (ln-transformed)</i>                     |
| ACE                          | $F_{1,29.42} = 2.988, p = 0.0944$              | $F_{1,30.20} = 2.148, p = 0.1531$                |
| LAC                          | $F_{1,29.08} = 2.958, p = 0.0961$              | $F_{1,30.04} = 5.118, p = 0.0311$                |
| YST                          | $F_{1,29.75} = 69.513, p = 2.8 \times 10^{-9}$ | $F_{1,30.47} = 169.154, p = 5.7 \times 10^{-14}$ |
| [Acetate]                    | $F_{1,30.63} = 0.792, p = 0.3803$              | $F_{1,28.74} = 1.078, p = 0.3079$                |
| ACE*[Acetate]                | $F_{1,29.83} = 1.189, p = 0.2844$              | $F_{1,30.06} = 0.018, p = 0.8938$                |
| LAC*[Acetate]                | $F_{1,30.24} = 0.445, p = 0.5099$              | $F_{1,31.89} = 3.185, p = 0.0839$                |
| YST*[Acetate]                | $F_{1,30.06} = 0.033, p = 0.8572$              | $F_{1,30.75} = 1.929, p = 0.1748$                |
| ACE*LAC                      | $F_{1,29.19} = 2.767, p = 0.1069$              | $F_{1,30.23} = 2.611, p = 0.1165$                |
| ACE*YST                      | $F_{1,30.02} = 11.299, p = 0.0021$             | $F_{1,30.31} = 4.688, p = 0.0384$                |
| LAC*YST                      | $F_{1,29.38} = 0.859, p = 0.3617$              | $F_{1,31.18} = 1.460, p = 0.2361$                |
| ACE*LAC*[Acetate]            | $F_{1,29.04} = 1.613, p = 0.2142$              | $F_{1,31.90} = 0.027, p = 0.8707$                |
| ACE*YST*[Acetate]            | $F_{1,30.62} = 0.487, p = 0.4907$              | $F_{1,32.00} = 1.281, p = 0.2661$                |
| LAC*YST*[Acetate]            | $F_{1,30.59} = 0.452, p = 0.5062$              | $F_{1,30.32} = 0.012, p = 0.9141$                |
| ACE*LAC*YST                  | $F_{1,29.28} = 0.135, p = 0.7161$              | $F_{1,30.83} = 1.206, p = 0.2806$                |
| ACE*LAC*YST*[Acetate]        | $F_{1,30.78} = 2.505, p = 0.1237$              | $F_{1,30.93} = 1.241, p = 0.2739$                |
| <i>Analysis of Deviance</i>  |                                                |                                                  |
| Experimental replicate       | $X^2_1 = 0.034,$<br>$p = 0.854$                | $X^2_1 = 35.47,$<br>$p = 2.6 \times 10^{-9}$     |
| <i>R<sup>2</sup></i>         |                                                |                                                  |
| Marginal                     | 0.684                                          | 0.814                                            |
| Conditional                  | 0.703                                          | 0.819                                            |

| <b>iii) Protein ~ Acetate</b> |                                                      |                                                                    |
|-------------------------------|------------------------------------------------------|--------------------------------------------------------------------|
| <i>ANOVA Effect test</i>      | <i>Female</i>                                        | <i>Male</i>                                                        |
| ACE                           | $F_{1,29.65} = 0.191, p = 0.6650$                    | $F_{1,30.27} = 1.102, p = 0.3021$                                  |
| LAC                           | $F_{1,29.16} = 0.003, p = 0.9564$                    | $F_{1,30.07} = 0.183, p = 0.6722$                                  |
| YST                           | $F_{1,30.08} = 8.476, p = 0.0067$                    | $F_{1,30.61} = 2.782, p = 0.1055$                                  |
| [Acetate]                     | $F_{1,27.86} = 1.729, p = 0.1992$                    | $F_{1,24.45} = 0.202, p = 0.6572$                                  |
| ACE*[Acetate]                 | $F_{1,30.43} = 0.831, p = 0.3691$                    | $F_{1,30.09} = 0.378, p = 0.5434$                                  |
| LAC*[Acetate]                 | $F_{1,30.68} = 0.772, p = 0.3864$                    | $F_{1,30.96} = 0.001, p = 0.9784$                                  |
| YST*[Acetate]                 | $F_{1,30.65} = 3.378, p = 0.0758$                    | $F_{1,30.92} = 0.137, p = 0.7135$                                  |
| ACE*LAC                       | $F_{1,29.37} = 0.206, p = 0.6537$                    | $F_{1,30.33} = 1.088, p = 0.3053$                                  |
| ACE*YST                       | $F_{1,30.51} = 1.043, p = 0.3153$                    | $F_{1,30.43} = 1.471, p = 0.2345$                                  |
| LAC*YST                       | $F_{1,29.69} = 0.768, p = 0.3880$                    | $F_{1,31.44} = 0.229, p = 0.6353$                                  |
| ACE*LAC*[Acetate]             | $F_{1,29.10} = 0.530, p = 0.4723$                    | $F_{1,32.00} = 1.453, p = 0.2368$                                  |
| ACE*YST*[Acetate]             | $F_{1,30.96} = 1.741, p = 0.1967$                    | $F_{1,31.69} = 0.113, p = 0.7395$                                  |
| LAC*YST*[Acetate]             | $F_{1,31.00} = 0.903, p = 0.3495$                    | $F_{1,30.41} = 0.052, p = 0.8218$                                  |
| ACE*LAC*YST                   | $F_{1,29.47} = 0.040, p = 0.8429$                    | $F_{1,31.04} = 0.225, p = 0.6384$                                  |
| ACE*LAC*YST*[Acetate]         | $F_{1,30.99} = 0.374, p = 0.5452$                    | $F_{1,31.13} = 0.924, p = 0.3440$                                  |
| <i>Analysis of Deviance</i>   |                                                      |                                                                    |
| Experimental replicate        | $X^2_1 = 0,$<br>$p = 1$                              | $X^2_1 = 0,$<br>$p = 1$                                            |
| <b><math>R^2</math></b>       |                                                      |                                                                    |
| Marginal                      | 0.346                                                | 0.201                                                              |
| Conditional                   | 0.346                                                | 0.201                                                              |
| <b>iv) Glycogen ~ Acetate</b> |                                                      |                                                                    |
| <i>ANOVA Effect test</i>      | <i>Female</i>                                        | <i>Male</i>                                                        |
| ACE                           | $F_{1,29.65} = 2.034, p = 0.1643$                    | $F_{1,30.06} = 5.552, p = 0.0252$                                  |
| LAC                           | $F_{1,29.16} = 1.837, p = 0.1857$                    | $F_{1,30.01} = 0.206, p = 0.6533$                                  |
| YST                           | <b><math>F_{1,30.08} = 13.687, p = 0.0009</math></b> | $F_{1,30.18} = 1.836, p = 0.1855$                                  |
| [Acetate]                     | $F_{1,27.86} = 0.483, p = 0.4929$                    | $F_{1,31.88} = 0.374, p = 0.5454$                                  |
| ACE*[Acetate]                 | $F_{1,30.43} = 0.191, p = 0.6650$                    | $F_{1,30.02} = 0.212, p = 0.6488$                                  |
| LAC*[Acetate]                 | $F_{1,30.68} = 0.252, p = 0.6194$                    | $F_{1,31.21} = 2.913, p = 0.0978$                                  |
| YST*[Acetate]                 | $F_{1,30.65} = 0.339, p = 0.5645$                    | $F_{1, 30.31} = 0.014, p = 0.9053$                                 |
| ACE*LAC                       | $F_{1,29.37} = 0.192, p = 0.6647$                    | $F_{1,30.07} = 1.364, p = 0.2520$                                  |
| ACE*YST                       | $F_{1,30.51} = 3.616, p = 0.0667$                    | $F_{1,30.10} = 1.797, p = 0.1901$                                  |
| LAC*YST                       | $F_{1,29.69} = 2.921, p = 0.0978$                    | $F_{1,30.46} = 2.026, p = 0.1648$                                  |
| ACE*LAC*[Acetate]             | $F_{1,29.10} = 0.199, p = 0.6586$                    | $F_{1,30.94} = 0.167, p = 0.6859$                                  |
| ACE*YST*[Acetate]             | $F_{1,30.96} = 0.447, p = 0.5089$                    | $F_{1, 31.12} = 0.364, p = 0.5508$                                 |
| LAC*YST*[Acetate]             | $F_{1,31.00} = 1.343, p = 0.2553$                    | $F_{1,30.11} = 0.716, p = 0.4040$                                  |
| ACE*LAC*YST                   | $F_{1,29.47} = 0.001, p = 0.9824$                    | $F_{1,30.31} = 0.613, p = 0.4398$                                  |
| ACE*LAC*YST*[Acetate]         | $F_{1,30.99} = 0.691, p = 0.4121$                    | $F_{1,30.36} = 2.029, p = 0.1645$                                  |
| <i>Analysis of Deviance</i>   |                                                      |                                                                    |
| Experimental replicate        | $X^2_1 = 0,$<br>$p = 1$                              | <b><math>X^2_1 = 3.96</math></b><br><b><math>p = 0.0466</math></b> |
| <b><math>R^2</math></b>       |                                                      |                                                                    |
| Marginal                      | 0.446                                                | 0.281                                                              |
| Conditional                   | 0.446                                                | 0.430                                                              |

| <b>v) Trehalose ~ Acetate</b> |                                                                     |                                                                       |
|-------------------------------|---------------------------------------------------------------------|-----------------------------------------------------------------------|
| <i>ANOVA Effect test</i>      | <i>Female (ln-transformed)</i>                                      | <i>Male (ln-transformed)</i>                                          |
| ACE                           | $F_{1,29.39} = 0.816, p = 0.3738$                                   | $F_{1,30.27} = 0.040, p = 0.8436$                                     |
| LAC                           | $F_{1,29.08} = 1.384, p = 0.2489$                                   | $F_{1,30.07} = 0.194, p = 0.6632$                                     |
| YST                           | <b><math>F_{1,29.72} = 25.518, p = 2.1 \times 10^{-5}</math></b>    | <b><math>F_{1,30.61} = 14.018, p = 0.0008</math></b>                  |
| [Acetate]                     | $F_{1,30.75} = 9.706, p = 0.0040$                                   | $F_{1,24.45} = 0.255, p = 0.6183$                                     |
| ACE*[Acetate]                 | $F_{1,29.77} = 7.690, p = 0.0095$                                   | $F_{1,30.09} = 0.316, p = 0.5784$                                     |
| LAC*[Acetate]                 | $F_{1,30.19} = 9.719, p = 0.0040$                                   | $F_{1,30.96} = 0.152, p = 0.6990$                                     |
| YST*[Acetate]                 | $F_{1,29.99} = 0.499, p = 0.4854$                                   | $F_{1,30.92} = 0.065, p = 0.8006$                                     |
| ACE*LAC                       | $F_{1,29.17} = 3.069, p = 0.0903$                                   | $F_{1,30.33} = 1.165, p = 0.2890$                                     |
| ACE*YST                       | $F_{1,29.97} = 6.471, p = 0.0164$                                   | $F_{1,30.43} = 0.599, p = 0.4450$                                     |
| LAC*YST                       | $F_{1,29.35} = 1.799, p = 0.1902$                                   | $F_{1,31.44} = 7.366, p = 0.0107$                                     |
| ACE*LAC*[Acetate]             | $F_{1,29.04} = 2.895, p = 0.0995$                                   | $F_{1,32.00} = 0.356, p = 0.5551$                                     |
| ACE*YST*[Acetate]             | $F_{1,30.57} = 1.088, p = 0.3051$                                   | $F_{1,31.69} = 0.092, p = 0.7635$                                     |
| LAC*YST*[Acetate]             | $F_{1,30.52} = 0.407, p = 0.5285$                                   | $F_{1,30.41} = 0.107, p = 0.7456$                                     |
| ACE*LAC*YST                   | $F_{1,29.26} = 0.129, p = 0.7219$                                   | $F_{1,31.04} = 0.442, p = 0.5110$                                     |
| ACE*LAC*YST*[Acetate]         | $F_{1,30.72} = 0.005, p = 0.9420$                                   | $F_{1,31.13} = 1.733, p = 0.1977$                                     |
| <b>Analysis of Deviance</b>   |                                                                     |                                                                       |
| Experimental replicate        | $X^2_1 = 0.25,$<br>$p = 0.6163$                                     | $X^2_1 = 0,$<br>$p = 1$                                               |
| <b>R<sup>2</sup></b>          |                                                                     |                                                                       |
| Marginal                      | 0.585                                                               | 0.394                                                                 |
| Conditional                   | 0.614                                                               | 0.394                                                                 |
| <b>vi) TAG ~ Propionate</b>   |                                                                     |                                                                       |
| <i>ANOVA Effect test</i>      | <i>Female</i>                                                       | <i>Male (sqrt-transformed)</i>                                        |
| ACE                           | $F_{1,29.03} = 6.032, p = 0.0203$                                   | <b><math>F_{1,30.06} = 30.458, p = 5.3 \times 10^{-6}</math></b>      |
| LAC                           | $F_{1,29.11} = 0.060, p = 0.8077$                                   | $F_{1,30.02} = 3.124, p = 0.0873$                                     |
| YST                           | $F_{1,29.10} = 2.672, p = 0.1129$                                   | <b><math>F_{1,30.26} = 397.131, p &gt; 2.2 \times 10^{-16}</math></b> |
| [Propionate]                  | $F_{1,30.25} = 1.034, p = 0.3173$                                   | $F_{1,31.33} = 0.054, p = 0.8172$                                     |
| ACE*[Propionate]              | $F_{1,29.46} = 0.599, p = 0.4451$                                   | $F_{1,30.26} = 7.695, p = 0.0094$                                     |
| LAC*[Propionate]              | $F_{1,29.27} = 0.001, p = 0.9716$                                   | $F_{1,30.75} = 0.010, p = 0.9207$                                     |
| YST*[Propionate]              | $F_{1,29.81} = 0.536, p = 0.4699$                                   | $F_{1,31.17} = 1.032, p = 0.3174$                                     |
| ACE*LAC                       | $F_{1,29.16} = 0.0002, p = 0.9877$                                  | $F_{1,30.02} = 7.213, p = 0.0117$                                     |
| ACE*YST                       | $F_{1,29.28} = 0.775, p = 0.3857$                                   | $F_{1,30.13} = 3.546, p = 0.0694$                                     |
| LAC*YST                       | $F_{1,29.03} = 1.431, p = 0.2413$                                   | $F_{1,30.26} = 11.174, p = 0.0022$                                    |
| ACE*LAC*[Propionate]          | $F_{1,29.79} = 1.349, p = 0.2548$                                   | $F_{1,30.70} = 3.355, p = 0.0767$                                     |
| ACE*YST*[Propionate]          | $F_{1,29.46} = 0.033, p = 0.8582$                                   | $F_{1,30.97} = 1.043, p = 0.3151$                                     |
| LAC*YST*[Propionate]          | $F_{1,30.63} = 0.551, p = 0.4637$                                   | $F_{1,31.32} = 0.037, p = 0.8484$                                     |
| ACE*LAC*YST                   | $F_{1,29.34} = 0.514, p = 0.4790$                                   | $F_{1,30.40} = 1.043, p = 0.3153$                                     |
| ACE*LAC*YST*[Propionate]      | $F_{1,29.28} = 0.040, p = 0.8425$                                   | $F_{1,30.06} = 0.104, p = 0.7495$                                     |
| <b>Analysis of Deviance</b>   |                                                                     |                                                                       |
| Experimental replicate        | <b><math>X^2_1 = 5.47,</math></b><br><b><math>p = 0.0193</math></b> | <b><math>X^2_1 = 6.20,</math></b><br><b><math>p = 0.0128</math></b>   |
| <b>R<sup>2</sup></b>          |                                                                     |                                                                       |
| Marginal                      | 0.244                                                               | 0.898                                                                 |
| Conditional                   | 0.429                                                               | 0.924                                                                 |

| <b>vii) Glucose ~ Propionate</b>  |                                                                  |                                                                    |
|-----------------------------------|------------------------------------------------------------------|--------------------------------------------------------------------|
| <i>ANOVA Effect test</i>          | <i>Female</i>                                                    | <i>Male (sqrt-transformed)</i>                                     |
| ACE                               | $F_{1,29.16} = 0.135, p = 0.7159$                                | $F_{1,30.08} = 0.648, p = 0.4273$                                  |
| LAC                               | $F_{1,29.36} = 4.994, p = 0.0332$                                | $F_{1,30.03} = 8.688, p = 0.0061$                                  |
| YST                               | <b><math>F_{1,29.44} = 43.147, p = 3.1 \times 10^{-7}</math></b> | <b><math>F_{1,30.35} = 137.028, p = 8.8 \times 10^{-13}</math></b> |
| [Propionate]                      | $F_{1,29.74} = 1.852, p = 0.1837$                                | $F_{1,31.65} = 0.813, p = 0.3741$                                  |
| ACE*[Propionate]                  | $F_{1,30.79} = 0.002, p = 0.9679$                                | $F_{1,30.35} = 0.017, p = 0.8968$                                  |
| LAC*[Propionate]                  | $F_{1,30.04} = 0.816, p = 0.3734$                                | $F_{1,31.00} = 0.414, p = 0.5249$                                  |
| YST*[Propionate]                  | $F_{1,30.98} = 2.409, p = 0.1308$                                | $F_{1,31.51} = 1.167, p = 0.2882$                                  |
| ACE*LAC                           | $F_{1,29.56} = 4.224, p = 0.0488$                                | $F_{1,30.03} = 1.327, p = 0.2585$                                  |
| ACE*YST                           | $F_{1,30.18} = 11.623, p = 0.0019$                               | $F_{1,30.18} = 2.251, p = 0.1439$                                  |
| LAC*YST                           | $F_{1,29.11} = 2.322, p = 0.1384$                                | $F_{1,30.35} = 4.411, p = 0.0441$                                  |
| ACE*LAC*[Propionate]              | $F_{1,31.00} = 0.366, p = 0.5497$                                | $F_{1,30.93} = 0.210, p = 0.6499$                                  |
| ACE*YST*[Propionate]              | $F_{1,30.53} = 2.592, p = 0.1177$                                | $F_{1,31.29} = 0.063, p = 0.8035$                                  |
| LAC*YST*[Propionate]              | $F_{1,26.25} = 1.055, p = 0.3137$                                | $F_{1,31.69} = 0.000, p = 0.9971$                                  |
| ACE*LAC*YST                       | $F_{1,30.34} = 0.417, p = 0.5235$                                | $F_{1,30.55} = 0.109, p = 0.7435$                                  |
| ACE*LAC*YST*[Propionate]          | $F_{1,30.34} = 1.193, p = 0.2833$                                | $F_{1,30.09} = 0.017, p = 0.8983$                                  |
| <b>Analysis of Deviance</b>       |                                                                  |                                                                    |
| Experimental replicate            | $X^2_1 = 0,$<br>$p = 1$                                          | $X^2_1 = 3.00,$<br>$p = 0.0834$                                    |
| <b>R<sup>2</sup></b>              |                                                                  |                                                                    |
| Marginal                          | 0.628                                                            | 0.768                                                              |
| Conditional                       | 0.628                                                            | 0.810                                                              |
| <b>viii) Protein ~ Propionate</b> |                                                                  |                                                                    |
| <i>ANOVA Effect test</i>          | <i>Female</i>                                                    | <i>Male</i>                                                        |
| ACE                               | $F_{1,29.16} = 0.388, p = 0.5381$                                | $F_{1,30.26} = 1.475, p = 0.2339$                                  |
| LAC                               | $F_{1,29.36} = 0.054, p = 0.8187$                                | $F_{1,30.09} = 0.203, p = 0.6557$                                  |
| YST                               | <b><math>F_{1,29.44} = 14.851, p = 0.0006</math></b>             | $F_{1,30.95} = 3.981, p = 0.0549$                                  |
| [Propionate]                      | $F_{1,29.74} = 0.654, p = 0.4253$                                | $F_{1,30.65} = 0.270, p = 0.6070$                                  |
| ACE*[Propionate]                  | $F_{1,30.79} = 0.817, p = 0.3730$                                | $F_{1,31.08} = 1.252, p = 0.2718$                                  |
| LAC*[Propionate]                  | $F_{1,30.04} = 2.740, p = 0.1083$                                | $F_{1,32.00} = 0.357, p = 0.5543$                                  |
| YST*[Propionate]                  | $F_{1,30.98} = 11.055, p = 0.0023$                               | $F_{1,30.52} = 0.774, p = 0.3859$                                  |
| ACE*LAC                           | $F_{1,29.56} = 0.412, p = 0.5258$                                | $F_{1,30.15} = 1.138, p = 0.2946$                                  |
| ACE*YST                           | $F_{1,30.18} = 2.117, p = 0.1560$                                | $F_{1,30.61} = 0.471, p = 0.4976$                                  |
| LAC*YST                           | $F_{1,29.11} = 1.518, p = 0.2278$                                | $F_{1,31.03} = 0.101, p = 0.7522$                                  |
| ACE*LAC*[Propionate]              | $F_{1,31.00} = 1.367, p = 0.2513$                                | $F_{1,32.00} = 2.610, p = 0.1160$                                  |
| ACE*YST*[Propionate]              | $F_{1,30.53} = 5.631, p = 0.0241$                                | $F_{1,30.68} = 0.788, p = 0.3817$                                  |
| LAC*YST*[Propionate]              | $F_{1,26.25} = 2.470, p = 0.1280$                                | $F_{1,26.45} = 0.300, p = 0.5887$                                  |
| ACE*LAC*YST                       | $F_{1,30.34} = 0.530, p = 0.4720$                                | $F_{1,31.60} = 0.303, p = 0.5861$                                  |
| ACE*LAC*YST*[Propionate]          | $F_{1,30.34} = 1.519, p = 0.2273$                                | $F_{1,30.35} = 0.746, p = 0.3945$                                  |
| <b>Analysis of Deviance</b>       |                                                                  |                                                                    |
| Experimental replicate            | $X^2_1 = 0,$<br>$p = 1$                                          | $X^2_1 = 0,$<br>$p = 1$                                            |
| <b>R<sup>2</sup></b>              |                                                                  |                                                                    |
| Marginal                          | 0.457                                                            | 0.256                                                              |
| Conditional                       | 0.457                                                            | 0.256                                                              |

| <b>ix) Glycogen ~ Propionate</b> |                                                      |                                                               |
|----------------------------------|------------------------------------------------------|---------------------------------------------------------------|
| <i>ANOVA Effect test</i>         | <i>Female</i>                                        | <i>Male</i>                                                   |
| ACE                              | $F_{1,29.16} = 3.263, p = 0.0812$                    | $F_{1,30.05} = 6.715, p = 0.0146$                             |
| LAC                              | $F_{1,29.36} = 1.484, p = 0.2328$                    | $F_{1,30.02} = 0.217, p = 0.6447$                             |
| YST                              | <b><math>F_{1,29.44} = 18.380, p = 0.0002</math></b> | $F_{1,30.21} = 1.252, p = 0.2721$                             |
| [Propionate]                     | $F_{1,29.74} = 0.284, p = 0.5981$                    | $F_{1,31.14} = 1.170, p = 0.2877$                             |
| ACE*[Propionate]                 | $F_{1,30.79} = 0.145, p = 0.7062$                    | $F_{1,30.21} = 0.967, p = 0.3334$                             |
| LAC*[Propionate]                 | $F_{1,30.04} = 0.623, p = 0.4361$                    | $F_{1,30.62} = 3.203, p = 0.0834$                             |
| YST*[Propionate]                 | $F_{1,30.98} = 1.601, p = 0.2152$                    | $F_{1,30.98} = 0.071, p = 0.7918$                             |
| ACE*LAC                          | $F_{1,29.56} = 0.571, p = 0.4560$                    | $F_{1,30.02} = 1.667, p = 0.2065$                             |
| ACE*YST                          | $F_{1,30.18} = 3.613, p = 0.0669$                    | $F_{1,30.11} = 2.313, p = 0.1388$                             |
| LAC*YST                          | $F_{1,29.11} = 4.109, p = 0.0519$                    | $F_{1,30.21} = 2.701, p = 0.1107$                             |
| ACE*LAC*[Propionate]             | $F_{1,31.00} = 0.325, p = 0.5730$                    | $F_{1,30.57} = 1.426, p = 0.2416$                             |
| ACE*YST*[Propionate]             | $F_{1,30.53} = 0.340, p = 0.5643$                    | $F_{1,30.79} = 0.158, p = 0.6941$                             |
| LAC*YST*[Propionate]             | $F_{1,26.25} = 0.736, p = 0.3989$                    | $F_{1,31.10} = 0.009, p = 0.9268$                             |
| ACE*LAC*YST                      | $F_{1,30.34} = 0.011, p = 0.9182$                    | $F_{1,30.33} = 0.189, p = 0.6667$                             |
| ACE*LAC*YST*[Propionate]         | $F_{1,30.34} = 2.587, p = 0.1181$                    | $F_{1,30.05} = 1.934, p = 0.1746$                             |
| <b>Analysis of Deviance</b>      |                                                      |                                                               |
| Experimental replicate           | $X^2_1 = 0,$<br>$p = 1$                              | <b><math>X^2_1 = 7.56,</math><br/><math>p = 0.0060</math></b> |
| <b>R<sup>2</sup></b>             |                                                      |                                                               |
| Marginal                         | 0.483                                                | 0.279                                                         |
| Conditional                      | 0.483                                                | 0.500                                                         |
| <b>x) Trehalose ~ Propionate</b> |                                                      |                                                               |
| <i>ANOVA Effect test</i>         | <i>Female (ln-transformed)</i>                       | <i>Male (ln-transformed)</i>                                  |
| ACE                              | $F_{1,29.07} = 0.007, p = 0.9320$                    | $F_{1,30.26} = 0.085, p = 0.7730$                             |
| LAC                              | $F_{1,29.20} = 1.861, p = 0.1829$                    | $F_{1,30.09} = 0.362, p = 0.5519$                             |
| YST                              | $F_{1,29.20} = 11.328, p = 0.0022$                   | $F_{1,30.95} = 11.648, p = 0.0018$                            |
| [Propionate]                     | $F_{1,30.93} = 2.714, p = 0.1096$                    | $F_{1,30.65} = 0.038, p = 0.8464$                             |
| ACE*[Propionate]                 | $F_{1,29.93} = 3.319, p = 0.0785$                    | $F_{1,31.08} = 0.131, p = 0.7198$                             |
| LAC*[Propionate]                 | $F_{1,29.52} = 0.341, p = 0.5639$                    | $F_{1,32.00} = 0.075, p = 0.7858$                             |
| YST*[Propionate]                 | $F_{1,30.40} = 2.145, p = 0.1533$                    | $F_{1,30.52} = 0.009, p = 0.9257$                             |
| ACE*LAC                          | $F_{1,29.30} = 2.671, p = 0.1129$                    | $F_{1,30.15} = 0.868, p = 0.3589$                             |
| ACE*YST                          | $F_{1,29.58} = 1.745, p = 0.1967$                    | $F_{1,30.61} = 0.939, p = 0.3401$                             |
| LAC*YST                          | $F_{1,29.05} = 4.912, p = 0.0347$                    | $F_{1,31.03} = 6.807, p = 0.0139$                             |
| ACE*LAC*[Propionate]             | $F_{1,30.42} = 1.177, p = 0.2864$                    | $F_{1,32.00} = 1.260, p = 0.2700$                             |
| ACE*YST*[Propionate]             | $F_{1,29.88} = 0.032, p = 0.8602$                    | $F_{1,30.68} = 0.013, p = 0.9117$                             |
| LAC*YST*[Propionate]             | $F_{1,30.91} = 2.222, p = 0.1462$                    | $F_{1,26.45} = 0.703, p = 0.4092$                             |
| ACE*LAC*YST                      | $F_{1,29.68} = 0.838, p = 0.3674$                    | $F_{1,31.60} = 1.205, p = 0.2806$                             |
| ACE*LAC*YST*[Propionate]         | $F_{1,29.60} = 0.007, p = 0.9363$                    | $F_{1,30.35} = 0.000, p = 0.9897$                             |
| <b>Analysis of Deviance</b>      |                                                      |                                                               |
| Experimental replicate           | $X^2_1 = 0.61,$<br>$p = 0.4345$                      | $X^2_1 = 0,$<br>$p = 1$                                       |
| <b>R<sup>2</sup></b>             |                                                      |                                                               |
| Marginal                         | 0.429                                                | 0.399                                                         |
| Conditional                      | 0.485                                                | 0.399                                                         |

| <b>xi) TAG ~ Butyrate</b>      |                                                                       |                                                                    |
|--------------------------------|-----------------------------------------------------------------------|--------------------------------------------------------------------|
| <i>ANOVA Effect test</i>       | <i>Female</i>                                                         | <i>Male</i>                                                        |
| ACE                            | $F_{1,29.02} = 11.610, p = 0.0019$                                    | <b><math>F_{1,30.02} = 28.194, p = 9.7 \times 10^{-6}</math></b>   |
| LAC                            | $F_{1,29.03} = 0.091, p = 0.7650$                                     | $F_{1,31.05} = 0.468, p = 0.4990$                                  |
| YST                            | $F_{1,29.05} = 7.143, p = 0.0122$                                     | <b><math>F_{1,31.72} = 168.330, p = 3.1 \times 10^{-14}</math></b> |
| [Butyrate]                     | $F_{1,29.98} = 1.113, p = 0.2999$                                     | $F_{1,29.95} = 0.066, p = 0.7994$                                  |
| ACE*[Butyrate]                 | $F_{1,29.12} = 1.895, p = 0.1792$                                     | $F_{1,30.04} = 0.435, p = 0.5146$                                  |
| LAC*[Butyrate]                 | $F_{1,29.01} = 0.155, p = 0.6965$                                     | $F_{1,30.33} = 0.032, p = 0.8584$                                  |
| YST*[Butyrate]                 | $F_{1,29.16} = 0.912, p = 0.3476$                                     | $F_{1,31.04} = 1.134, p = 0.2951$                                  |
| ACE*LAC                        | $F_{1,29.08} = 0.182, p = 0.6727$                                     | $F_{1,30.23} = 4.330, p = 0.0460$                                  |
| ACE*YST                        | $F_{1,29.01} = 1.257, p = 0.2714$                                     | $F_{1,30.06} = 9.371, p = 0.0046$                                  |
| LAC*YST                        | $F_{1,29.01} = 0.030, p = 0.8637$                                     | $F_{1,30.08} = 2.292, p = 0.1405$                                  |
| ACE*LAC*[Butyrate]             | $F_{1,30.25} = 0.472, p = 0.4973$                                     | $F_{1,31.78} = 1.770, p = 0.1929$                                  |
| ACE*YST*[Butyrate]             | $F_{1,29.02} = 6.957, p = 0.0133$                                     | $F_{1,31.32} = 0.867, p = 0.3588$                                  |
| LAC*YST*[Butyrate]             | $F_{1,29.14} = 1.651, p = 0.2090$                                     | $F_{1,30.51} = 2.824, p = 0.1031$                                  |
| ACE*LAC*YST                    | $F_{1,29.16} = 0.004, p = 0.9500$                                     | $F_{1,31.97} = 5.565, p = 0.0246$                                  |
| ACE*LAC*YST*[Butyrate]         | $F_{1,29.15} = 0.236, p = 0.6305$                                     | $F_{1,31.41} = 0.186, p = 0.6695$                                  |
| <b>Analysis of Deviance</b>    |                                                                       |                                                                    |
| Experimental replicate         | <b><math>X^2_1 = 12.84,</math><br/><b><math>p = 0.0003</math></b></b> | $X^2_1 = 0,$<br>$p = 0.7386$                                       |
| <b><math>R^2</math></b>        |                                                                       |                                                                    |
| Marginal                       | 0.281                                                                 | 0.879                                                              |
| Conditional                    | 0.590                                                                 | 0.887                                                              |
| <b>xii) Glucose ~ Butyrate</b> |                                                                       |                                                                    |
| <i>ANOVA Effect test</i>       | <i>Female</i>                                                         | <i>Male</i>                                                        |
| ACE                            | $F_{1,29.06} = 0.112, p = 0.7404$                                     | $F_{1,30.01} = 0.200, p = 0.6581$                                  |
| LAC                            | $F_{1,29.09} = 2.510, p = 0.1239$                                     | $F_{1,30.73} = 10.487, p = 0.0029$                                 |
| YST                            | <b><math>F_{1,29.16} = 41.598, p = 4.6 \times 10^{-7}</math></b>      | <b><math>F_{1,31.34} = 67.071, p = 2.8 \times 10^{-9}</math></b>   |
| [Butyrate]                     | $F_{1,30.99} = 0.186, p = 0.6690$                                     | $F_{1,31.76} = 0.992, p = 0.3268$                                  |
| ACE*[Butyrate]                 | $F_{1,29.42} = 0.709, p = 0.4065$                                     | $F_{1,30.02} = 1.355, p = 0.2536$                                  |
| LAC*[Butyrate]                 | $F_{1,29.05} = 1.072, p = 0.3090$                                     | $F_{1,30.22} = 0.793, p = 0.3804$                                  |
| YST*[Butyrate]                 | $F_{1,29.52} = 1.912, p = 0.1772$                                     | $F_{1,31.99} = 3.458, p = 0.0722$                                  |
| ACE*LAC                        | $F_{1,29.29} = 1.056, p = 0.3126$                                     | $F_{1,30.16} = 0.001, p = 0.9718$                                  |
| ACE*YST                        | $F_{1,29.04} = 10.692, p = 0.0028$                                    | $F_{1,30.04} = 1.670, p = 0.2061$                                  |
| LAC*YST                        | $F_{1,29.04} = 0.479, p = 0.4944$                                     | $F_{1,30.05} = 1.884, p = 0.1800$                                  |
| ACE*LAC*[Butyrate]             | $F_{1,30.38} = 1.820, p = 0.1873$                                     | $F_{1,31.94} = 0.248, p = 0.6222$                                  |
| ACE*YST*[Butyrate]             | $F_{1,29.08} = 0.000, p = 0.9997$                                     | $F_{1,30.92} = 2.975, p = 0.0945$                                  |
| LAC*YST*[Butyrate]             | $F_{1,29.49} = 0.443, p = 0.5108$                                     | $F_{1,30.35} = 2.719, p = 0.1095$                                  |
| ACE*LAC*YST                    | $F_{1,29.54} = 0.016, p = 0.8997$                                     | $F_{1,31.83} = 0.004, p = 0.9522$                                  |
| ACE*LAC*YST*[Butyrate]         | $F_{1,29.51} = 0.307, p = 0.5839$                                     | $F_{1,30.94} = 0.466, p = 0.5000$                                  |
| <b>Analysis of Deviance</b>    |                                                                       |                                                                    |
| Experimental replicate         | $X^2_1 = 1.49,$<br>$p = 0.2217$                                       | $X^2_1 = 1.67,$<br>$p = 0.1965$                                    |
| <b><math>R^2</math></b>        |                                                                       |                                                                    |
| Marginal                       | 0.612                                                                 | 0.759                                                              |
| Conditional                    | 0.661                                                                 | 0.793                                                              |

| <b>xiii) Protein ~ Butyrate</b> |                                                                  |                                                               |
|---------------------------------|------------------------------------------------------------------|---------------------------------------------------------------|
| <i>ANOVA Effect test</i>        | <i>Female</i>                                                    | <i>Male</i>                                                   |
| ACE                             | $F_{1,29.16} = 0.140, p = 0.7111$                                | $F_{1,30.06} = 0.098, p = 0.7563$                             |
| LAC                             | $F_{1,29.23} = 0.001, p = 0.9729$                                | $F_{1,31.53} = 0.360, p = 0.5527$                             |
| YST                             | $F_{1,29.38} = 11.624, p = 0.0019$                               | $F_{1,32.00} = 0.328, p = 0.5706$                             |
| [Butyrate]                      | $F_{1,24.74} = 0.723, p = 0.4035$                                | $F_{1,22.88} = 2.488, p = 0.1285$                             |
| ACE*[Butyrate]                  | $F_{1,30.03} = 0.006, p = 0.9371$                                | $F_{1,30.08} = 0.751, p = 0.3931$                             |
| LAC*[Butyrate]                  | $F_{1,29.12} = 0.610, p = 0.4413$                                | $F_{1,30.52} = 1.053, p = 0.3129$                             |
| YST*[Butyrate]                  | $F_{1,30.17} = 2.140, p = 0.1539$                                | $F_{1,25.48} = 0.895, p = 0.3531$                             |
| ACE*LAC                         | $F_{1,29.73} = 0.017, p = 0.8960$                                | $F_{1,30.36} = 0.618, p = 0.4378$                             |
| ACE*YST                         | $F_{1,29.10} = 0.198, p = 0.6596$                                | $F_{1,30.12} = 1.896, p = 0.1787$                             |
| LAC*YST                         | $F_{1,29.12} = 0.609, p = 0.4416$                                | $F_{1,30.16} = 0.279, p = 0.6012$                             |
| ACE*LAC*[Butyrate]              | $F_{1,14.72} = 0.616, p = 0.4450$                                | $F_{1,28.35} = 0.029, p = 0.8669$                             |
| ACE*YST*[Butyrate]              | $F_{1,29.22} = 0.745, p = 0.3952$                                | $F_{1,31.85} = 0.003, p = 0.9545$                             |
| LAC*YST*[Butyrate]              | $F_{1,30.25} = 0.008, p = 0.9290$                                | $F_{1,30.78} = 0.680, p = 0.4159$                             |
| ACE*LAC*YST                     | $F_{1,30.24} = 0.004, p = 0.9476$                                | $F_{1,30.21} = 0.134, p = 0.7168$                             |
| ACE*LAC*YST*[Butyrate]          | $F_{1,30.17} = 0.052, p = 0.8217$                                | $F_{1,31.99} = 0.004, p = 0.9533$                             |
| <b>Analysis of Deviance</b>     |                                                                  |                                                               |
| Experimental replicate          | $X^2_1 = 0,$<br>$p = 1$                                          | $X^2_1 = 0,$<br>$p = 1$                                       |
| <b>R<sup>2</sup></b>            |                                                                  |                                                               |
| Marginal                        | 0.285                                                            | 0.272                                                         |
| Conditional                     | 0.285                                                            | 0.272                                                         |
| <b>xiv) Glycogen ~ Butyrate</b> |                                                                  |                                                               |
| <i>ANOVA Effect test</i>        | <i>Female</i>                                                    | <i>Male</i>                                                   |
| ACE                             | $F_{1,29.08} = 3.886, p = 0.0583$                                | $F_{1,30.01} = 6.741, p = 0.0144$                             |
| LAC                             | $F_{1,29.12} = 1.296, p = 0.2642$                                | $F_{1,30.37} = 0.024, p = 0.8788$                             |
| YST                             | <b><math>F_{1,29.21} = 23.094, p = 4.3 \times 10^{-5}</math></b> | $F_{1,30.76} = 0.816, p = 0.3735$                             |
| [Butyrate]                      | $F_{1,30.57} = 6.287, p = 0.0177$                                | $F_{1,31.73} = 2.098, p = 0.1574$                             |
| ACE*[Butyrate]                  | $F_{1,29.56} = 0.005, p = 0.9418$                                | $F_{1,30.01} = 1.882, p = 0.1803$                             |
| LAC*[Butyrate]                  | $F_{1,29.06} = 1.963, p = 0.1718$                                | $F_{1,30.10} = 0.098, p = 0.7569$                             |
| YST*[Butyrate]                  | $F_{1,29.68} = 2.146, p = 0.1534$                                | $F_{1,31.46} = 0.008, p = 0.9286$                             |
| ACE*LAC                         | $F_{1,29.39} = 3.780, p = 0.0615$                                | $F_{1,30.08} = 1.299, p = 0.2635$                             |
| ACE*YST                         | $F_{1,29.05} = 7.223, p = 0.0118$                                | $F_{1,30.02} = 2.084, p = 0.1593$                             |
| LAC*YST                         | $F_{1,29.06} = 8.440, p = 0.0070$                                | $F_{1,30.02} = 0.101, p = 0.7526$                             |
| ACE*LAC*[Butyrate]              | $F_{1,28.41} = 1.487, p = 0.2327$                                | $F_{1,31.20} = 0.867, p = 0.3588$                             |
| ACE*YST*[Butyrate]              | $F_{1,29.11} = 1.495, p = 0.2313$                                | $F_{1,30.46} = 0.100, p = 0.7543$                             |
| LAC*YST*[Butyrate]              | $F_{1,29.65} = 1.465, p = 0.2357$                                | $F_{1,30.17} = 0.053, p = 0.8199$                             |
| ACE*LAC*YST                     | $F_{1,29.70} = 0.231, p = 0.6341$                                | $F_{1,31.07} = 0.048, p = 0.8273$                             |
| ACE*LAC*YST*[Butyrate]          | $F_{1,29.66} = 0.060, p = 0.8088$                                | $F_{1,30.44} = 0.031, p = 0.8622$                             |
| <b>Analysis of Deviance</b>     |                                                                  |                                                               |
| Experimental replicate          | $X^2_1 = 0.46,$<br>$p = 0.4963$                                  | <b><math>X^2_1 = 6.35,</math><br/><math>p = 0.0118</math></b> |
| <b>R<sup>2</sup></b>            |                                                                  |                                                               |
| Marginal                        | 0.570                                                            | 0.228                                                         |
| Conditional                     | 0.604                                                            | 0.470                                                         |



| <b>xv) Trehalose ~ Butyrate</b> |                                      |                                      |
|---------------------------------|--------------------------------------|--------------------------------------|
| <b>ANOVA Effect test</b>        | <b>Female (sqrt-transformed)</b>     | <b>Male (sqrt-transformed)</b>       |
| ACE                             | $F_{1,29.16} = 0.000$ , $p = 0.9847$ | $F_{1,30.06} = 0.150$ , $p = 0.7013$ |
| LAC                             | $F_{1,29.23} = 1.376$ , $p = 0.2503$ | $F_{1,31.53} = 0.464$ , $p = 0.5007$ |
| YST                             | $F_{1,29.38} = 6.001$ , $p = 0.0205$ | $F_{1,32.00} = 2.776$ , $p = 0.1055$ |
| [Butyrate]                      | $F_{1,24.74} = 0.009$ , $p = 0.9263$ | $F_{1,22.88} = 0.283$ , $p = 0.6000$ |
| ACE*[Butyrate]                  | $F_{1,30.03} = 0.639$ , $p = 0.4305$ | $F_{1,30.08} = 0.025$ , $p = 0.8766$ |
| LAC*[Butyrate]                  | $F_{1,29.12} = 0.005$ , $p = 0.9440$ | $F_{1,30.52} = 1.568$ , $p = 0.2201$ |
| YST*[Butyrate]                  | $F_{1,30.17} = 0.310$ , $p = 0.5817$ | $F_{1,25.48} = 0.210$ , $p = 0.6510$ |
| ACE*LAC                         | $F_{1,29.73} = 4.091$ , $p = 0.0522$ | $F_{1,30.36} = 1.358$ , $p = 0.2530$ |
| ACE*YST                         | $F_{1,29.10} = 0.135$ , $p = 0.7163$ | $F_{1,30.12} = 0.363$ , $p = 0.5515$ |
| LAC*YST                         | $F_{1,29.12} = 5.802$ , $p = 0.0226$ | $F_{1,30.16} = 9.627$ , $p = 0.0041$ |
| ACE*LAC*[Butyrate]              | $F_{1,14.72} = 0.285$ , $p = 0.6017$ | $F_{1,28.35} = 0.086$ , $p = 0.7711$ |
| ACE*YST*[Butyrate]              | $F_{1,29.22} = 0.205$ , $p = 0.6542$ | $F_{1,31.85} = 0.184$ , $p = 0.6707$ |
| LAC*YST*[Butyrate]              | $F_{1,30.25} = 0.027$ , $p = 0.8699$ | $F_{1,30.78} = 0.165$ , $p = 0.6875$ |
| ACE*LAC*YST                     | $F_{1,30.24} = 0.131$ , $p = 0.7197$ | $F_{1,30.21} = 0.014$ , $p = 0.9070$ |
| ACE*LAC*YST*[Butyrate]          | $F_{1,30.17} = 0.143$ , $p = 0.7078$ | $F_{1,31.99} = 0.081$ , $p = 0.7778$ |
| <b>Analysis of Deviance</b>     |                                      |                                      |
| Experimental replicate          | $X^2_1 = 0$ ,<br>$p = 1$             | $X^2_1 = 0$ ,<br>$p = 1$             |
| <b>R<sup>2</sup></b>            |                                      |                                      |
| Marginal                        | 0.344                                | 0.372                                |
| Conditional                     | 0.344                                | 0.372                                |

P-values below the threshold are bolded.
